# Supplementary material for: Copper(i)-assisted red-shifted phosphorescence in Au(i)⋯Cu(i) heteropolynuclear complexes
Source: Royal Society of Chemistry journal article supplement (doi:10.1039/c4dt02154a), 2014-09-24
Supplement: c4dt02154a1.pdf [file c4dt02154a1.pdf]

## **Copper(I)-assisted red-shifted phosphorescence in Au(I)···Cu(I) heteropolynuclear complexes.**

**Vincent J. Catalano,<sup>\*a</sup> José M. López-de-Luzuriaga,<sup>\*b</sup> Miguel Monge,<sup>b</sup> M. Elena Olmos<sup>b</sup> and David Pascual<sup>b</sup>.**

<sup>a</sup> Department of Chemistry, University of Nevada, Reno, NV 89557 (USA). E-mail: vjc@unr.edu

<sup>b</sup> Departamento de Química, Universidad de La Rioja, Centro de Investigación de Síntesis Química (CISQ). Complejo Científico-Tecnológico, 26004-Logroño, SPAIN. Fax: +34 941 299 621. Tel: +34 941 299 649; E-mail: josemaria.lopez@unirioja.es

## **ELECTRONIC SUPPLEMENTARY INFORMATION**

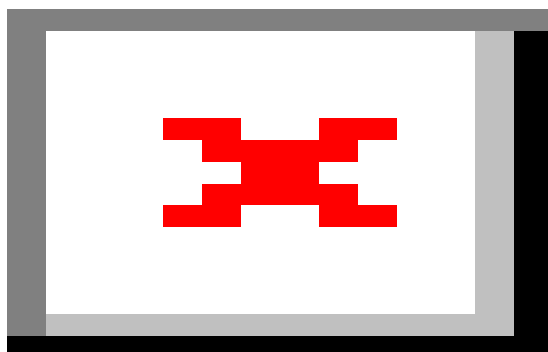

**Figure S1.** Thermal ellipsoid plot (50%) of  $\text{Au}(\text{C}_6\text{Cl}_2\text{F}_3)(\text{PPh}_2\text{py})$ , **1**. Two molecules crystallize in the asymmetric unit.

Table S1. Xray crystallographic information for Au(C<sub>6</sub>Cl<sub>2</sub>F<sub>3</sub>)(PPh<sub>2</sub>py), **1**.

|                                   |                                                                                                              |                    |
|-----------------------------------|--------------------------------------------------------------------------------------------------------------|--------------------|
| Identification code               | cat3                                                                                                         |                    |
| Empirical formula                 | C <sub>46</sub> H <sub>28</sub> Au <sub>2</sub> Cl <sub>4</sub> F <sub>6</sub> N <sub>2</sub> P <sub>2</sub> |                    |
| Formula weight                    | 1320.38                                                                                                      |                    |
| Temperature                       | 100(2) K                                                                                                     |                    |
| Wavelength                        | 0.71073 Å                                                                                                    |                    |
| Crystal system                    | Triclinic                                                                                                    |                    |
| Space group                       | P-1                                                                                                          |                    |
| Unit cell dimensions              | a = 12.1417(4) Å                                                                                             | α = 112.3340(10)°. |
|                                   | b = 14.0807(4) Å                                                                                             | β = 106.4260(10)°. |
|                                   | c = 14.7208(4) Å                                                                                             | γ = 93.7410(10)°.  |
| Volume                            | 2190.20(11) Å <sup>3</sup>                                                                                   |                    |
| Z                                 | 2                                                                                                            |                    |
| Density (calculated)              | 2.002 Mg/m <sup>3</sup>                                                                                      |                    |
| Absorption coefficient            | 7.070 mm <sup>-1</sup>                                                                                       |                    |
| F(000)                            | 1256                                                                                                         |                    |
| Crystal size                      | 0.340 x 0.230 x 0.230 mm <sup>3</sup>                                                                        |                    |
| Theta range for data collection   | 1.586 to 27.499°.                                                                                            |                    |
| Index ranges                      | -15<=h<=15, -18<=k<=18, -19<=l<=19                                                                           |                    |
| Reflections collected             | 46019                                                                                                        |                    |
| Independent reflections           | 10052 [R(int) = 0.0592]                                                                                      |                    |
| Completeness to theta = 25.242°   | 100.0 %                                                                                                      |                    |
| Absorption correction             | Semi-empirical from equivalents                                                                              |                    |
| Refinement method                 | Full-matrix least-squares on F <sup>2</sup>                                                                  |                    |
| Data / restraints / parameters    | 10052 / 0 / 560                                                                                              |                    |
| Goodness-of-fit on F <sup>2</sup> | 1.003                                                                                                        |                    |
| Final R indices [I>2sigma(I)]     | R1 = 0.0286, wR2 = 0.0513                                                                                    |                    |
| R indices (all data)              | R1 = 0.0416, wR2 = 0.0540                                                                                    |                    |
| Extinction coefficient            | 0.00009(4)                                                                                                   |                    |
| Largest diff. peak and hole       | 0.746 and -0.660 e.Å <sup>-3</sup>                                                                           |                    |

Table S2. Bond distance (Å) and angles (°) for Au(C<sub>6</sub>Cl<sub>2</sub>F<sub>3</sub>)(PPh<sub>2</sub>py), **1**.

|              |            |                  |            |
|--------------|------------|------------------|------------|
| Au(1)-C(1)   | 2.052(4)   | N(2)-C(34)       | 1.402(6)   |
| Au(1)-P(1)   | 2.2803(10) | C(46)-C(41)      | 1.382(5)   |
| P(1)-C(18)   | 1.810(4)   | C(46)-C(45)      | 1.393(6)   |
| P(1)-C(12)   | 1.821(4)   | C(46)-H(46A)     | 0.9500     |
| P(1)-C(7)    | 1.822(4)   | Cl(3)-C(26)      | 1.721(4)   |
| N(1)-C(7)    | 1.374(5)   | Cl(4)-C(28)      | 1.723(4)   |
| N(1)-C(11)   | 1.374(5)   | F(4)-C(25)       | 1.352(4)   |
| Cl(1)-C(3)   | 1.724(4)   | F(5)-C(27)       | 1.346(4)   |
| Cl(2)-C(5)   | 1.727(4)   | F(6)-C(29)       | 1.364(4)   |
| F(1)-C(2)    | 1.363(4)   | C(24)-C(29)      | 1.375(5)   |
| F(2)-C(4)    | 1.353(4)   | C(24)-C(25)      | 1.381(5)   |
| F(3)-C(6)    | 1.350(4)   | C(25)-C(26)      | 1.388(5)   |
| C(1)-C(2)    | 1.373(5)   | C(26)-C(27)      | 1.378(5)   |
| C(1)-C(6)    | 1.386(5)   | C(27)-C(28)      | 1.387(5)   |
| C(2)-C(3)    | 1.376(5)   | C(28)-C(29)      | 1.385(6)   |
| C(3)-C(4)    | 1.380(5)   | C(30)-C(31)      | 1.377(6)   |
| C(4)-C(5)    | 1.387(5)   | C(31)-C(32)      | 1.380(6)   |
| C(5)-C(6)    | 1.377(5)   | C(31)-H(31A)     | 0.9500     |
| C(7)-C(8)    | 1.372(5)   | C(32)-C(33)      | 1.355(8)   |
| C(8)-C(9)    | 1.387(6)   | C(32)-H(32A)     | 0.9500     |
| C(8)-H(8A)   | 0.9500     | C(33)-C(34)      | 1.381(8)   |
| C(9)-C(10)   | 1.382(6)   | C(33)-H(33A)     | 0.9500     |
| C(9)-H(9A)   | 0.9500     | C(34)-H(34A)     | 0.9500     |
| C(10)-C(11)  | 1.384(6)   | C(35)-C(40)      | 1.377(5)   |
| C(10)-H(10A) | 0.9500     | C(35)-C(36)      | 1.381(5)   |
| C(11)-H(11A) | 0.9500     | C(36)-C(37)      | 1.386(6)   |
| C(12)-C(13)  | 1.386(5)   | C(36)-H(36A)     | 0.9500     |
| C(12)-C(17)  | 1.389(5)   | C(37)-C(38)      | 1.384(6)   |
| C(13)-C(14)  | 1.369(5)   | C(37)-H(37A)     | 0.9500     |
| C(13)-H(13A) | 0.9500     | C(38)-C(39)      | 1.393(6)   |
| C(14)-C(15)  | 1.387(6)   | C(38)-H(38A)     | 0.9500     |
| C(14)-H(14A) | 0.9500     | C(39)-C(40)      | 1.369(6)   |
| C(15)-C(16)  | 1.395(6)   | C(39)-H(39A)     | 0.9500     |
| C(15)-H(15A) | 0.9500     | C(40)-H(40A)     | 0.9500     |
| C(16)-C(17)  | 1.381(5)   | C(41)-C(42)      | 1.379(5)   |
| C(16)-H(16A) | 0.9500     | C(42)-C(43)      | 1.384(6)   |
| C(17)-H(17A) | 0.9500     | C(42)-H(42A)     | 0.9500     |
| C(18)-C(23)  | 1.366(5)   | C(43)-C(44)      | 1.374(6)   |
| C(18)-C(19)  | 1.391(5)   | C(43)-H(43A)     | 0.9500     |
| C(19)-C(20)  | 1.381(6)   | C(44)-C(45)      | 1.375(6)   |
| C(19)-H(19A) | 0.9500     | C(44)-H(44A)     | 0.9500     |
| C(20)-C(21)  | 1.379(6)   | C(45)-H(45A)     | 0.9500     |
| C(20)-H(20A) | 0.9500     |                  |            |
| C(21)-C(22)  | 1.372(6)   | C(1)-Au(1)-P(1)  | 174.55(11) |
| C(21)-H(21A) | 0.9500     | C(18)-P(1)-C(12) | 104.34(18) |
| C(22)-C(23)  | 1.379(6)   | C(18)-P(1)-C(7)  | 106.29(18) |
| C(22)-H(22A) | 0.9500     | C(12)-P(1)-C(7)  | 104.99(17) |
| C(23)-H(23A) | 0.9500     | C(18)-P(1)-Au(1) | 115.51(13) |
| Au(2)-C(24)  | 2.053(4)   | C(12)-P(1)-Au(1) | 114.00(12) |
| Au(2)-P(2)   | 2.2775(10) | C(7)-P(1)-Au(1)  | 110.85(13) |
| P(2)-C(35)   | 1.812(4)   | C(7)-N(1)-C(11)  | 117.5(4)   |
| P(2)-C(41)   | 1.820(4)   | C(2)-C(1)-C(6)   | 113.9(3)   |
| P(2)-C(30)   | 1.820(4)   | C(2)-C(1)-Au(1)  | 121.2(3)   |
| N(2)-C(30)   | 1.379(5)   | C(6)-C(1)-Au(1)  | 124.9(3)   |

|                    |          |                    |            |
|--------------------|----------|--------------------|------------|
| F(1)-C(2)-C(1)     | 118.6(3) | C(19)-C(20)-H(20A) | 120.1      |
| F(1)-C(2)-C(3)     | 115.9(3) | C(22)-C(21)-C(20)  | 119.1(4)   |
| C(1)-C(2)-C(3)     | 125.5(4) | C(22)-C(21)-H(21A) | 120.5      |
| C(2)-C(3)-C(4)     | 117.4(4) | C(20)-C(21)-H(21A) | 120.5      |
| C(2)-C(3)-Cl(1)    | 122.7(3) | C(21)-C(22)-C(23)  | 121.6(4)   |
| C(4)-C(3)-Cl(1)    | 119.9(3) | C(21)-C(22)-H(22A) | 119.2      |
| F(2)-C(4)-C(3)     | 120.1(4) | C(23)-C(22)-H(22A) | 119.2      |
| F(2)-C(4)-C(5)     | 119.0(3) | C(18)-C(23)-C(22)  | 119.3(4)   |
| C(3)-C(4)-C(5)     | 120.9(4) | C(18)-C(23)-H(23A) | 120.3      |
| C(6)-C(5)-C(4)     | 117.7(3) | C(22)-C(23)-H(23A) | 120.3      |
| C(6)-C(5)-Cl(2)    | 122.2(3) | C(24)-Au(2)-P(2)   | 173.35(11) |
| C(4)-C(5)-Cl(2)    | 120.0(3) | C(35)-P(2)-C(41)   | 106.09(17) |
| F(3)-C(6)-C(5)     | 116.5(3) | C(35)-P(2)-C(30)   | 105.37(18) |
| F(3)-C(6)-C(1)     | 118.9(3) | C(41)-P(2)-C(30)   | 104.16(17) |
| C(5)-C(6)-C(1)     | 124.6(4) | C(35)-P(2)-Au(2)   | 114.92(13) |
| N(1)-C(7)-C(8)     | 121.8(4) | C(41)-P(2)-Au(2)   | 115.18(13) |
| N(1)-C(7)-P(1)     | 118.5(3) | C(30)-P(2)-Au(2)   | 110.15(14) |
| C(8)-C(7)-P(1)     | 119.7(3) | C(30)-N(2)-C(34)   | 114.8(4)   |
| C(7)-C(8)-C(9)     | 120.3(4) | C(41)-C(46)-C(45)  | 120.2(4)   |
| C(7)-C(8)-H(8A)    | 119.8    | C(41)-C(46)-H(46A) | 119.9      |
| C(9)-C(8)-H(8A)    | 119.8    | C(45)-C(46)-H(46A) | 119.9      |
| C(10)-C(9)-C(8)    | 118.7(4) | C(29)-C(24)-C(25)  | 114.2(4)   |
| C(10)-C(9)-H(9A)   | 120.7    | C(29)-C(24)-Au(2)  | 119.5(3)   |
| C(8)-C(9)-H(9A)    | 120.7    | C(25)-C(24)-Au(2)  | 126.2(3)   |
| C(9)-C(10)-C(11)   | 119.6(4) | F(4)-C(25)-C(24)   | 119.0(3)   |
| C(9)-C(10)-H(10A)  | 120.2    | F(4)-C(25)-C(26)   | 116.4(3)   |
| C(11)-C(10)-H(10A) | 120.2    | C(24)-C(25)-C(26)  | 124.6(4)   |
| N(1)-C(11)-C(10)   | 122.0(4) | C(27)-C(26)-C(25)  | 117.5(4)   |
| N(1)-C(11)-H(11A)  | 119.0    | C(27)-C(26)-Cl(3)  | 119.9(3)   |
| C(10)-C(11)-H(11A) | 119.0    | C(25)-C(26)-Cl(3)  | 122.6(3)   |
| C(13)-C(12)-C(17)  | 120.2(4) | F(5)-C(27)-C(26)   | 119.1(3)   |
| C(13)-C(12)-P(1)   | 117.1(3) | F(5)-C(27)-C(28)   | 119.4(3)   |
| C(17)-C(12)-P(1)   | 122.6(3) | C(26)-C(27)-C(28)  | 121.5(4)   |
| C(14)-C(13)-C(12)  | 119.9(4) | C(29)-C(28)-C(27)  | 117.0(4)   |
| C(14)-C(13)-H(13A) | 120.0    | C(29)-C(28)-Cl(4)  | 122.3(3)   |
| C(12)-C(13)-H(13A) | 120.0    | C(27)-C(28)-Cl(4)  | 120.7(3)   |
| C(13)-C(14)-C(15)  | 120.6(4) | F(6)-C(29)-C(24)   | 119.0(4)   |
| C(13)-C(14)-H(14A) | 119.7    | F(6)-C(29)-C(28)   | 115.7(3)   |
| C(15)-C(14)-H(14A) | 119.7    | C(24)-C(29)-C(28)  | 125.2(4)   |
| C(14)-C(15)-C(16)  | 119.4(4) | C(31)-C(30)-N(2)   | 123.3(4)   |
| C(14)-C(15)-H(15A) | 120.3    | C(31)-C(30)-P(2)   | 119.9(3)   |
| C(16)-C(15)-H(15A) | 120.3    | N(2)-C(30)-P(2)    | 116.6(3)   |
| C(17)-C(16)-C(15)  | 120.1(4) | C(30)-C(31)-C(32)  | 119.2(5)   |
| C(17)-C(16)-H(16A) | 120.0    | C(30)-C(31)-H(31A) | 120.4      |
| C(15)-C(16)-H(16A) | 120.0    | C(32)-C(31)-H(31A) | 120.4      |
| C(16)-C(17)-C(12)  | 119.7(4) | C(33)-C(32)-C(31)  | 120.2(5)   |
| C(16)-C(17)-H(17A) | 120.1    | C(33)-C(32)-H(32A) | 119.9      |
| C(12)-C(17)-H(17A) | 120.1    | C(31)-C(32)-H(32A) | 119.9      |
| C(23)-C(18)-C(19)  | 119.9(4) | C(32)-C(33)-C(34)  | 119.4(5)   |
| C(23)-C(18)-P(1)   | 121.0(3) | C(32)-C(33)-H(33A) | 120.3      |
| C(19)-C(18)-P(1)   | 119.1(3) | C(34)-C(33)-H(33A) | 120.3      |
| C(20)-C(19)-C(18)  | 120.2(4) | C(33)-C(34)-N(2)   | 122.9(5)   |
| C(20)-C(19)-H(19A) | 119.9    | C(33)-C(34)-H(34A) | 118.5      |
| C(18)-C(19)-H(19A) | 119.9    | N(2)-C(34)-H(34A)  | 118.5      |
| C(21)-C(20)-C(19)  | 119.9(4) | C(40)-C(35)-C(36)  | 120.1(4)   |
| C(21)-C(20)-H(20A) | 120.1    | C(40)-C(35)-P(2)   | 118.5(3)   |

|                    |          |                    |          |
|--------------------|----------|--------------------|----------|
| C(36)-C(35)-P(2)   | 121.1(3) | C(42)-C(41)-C(46)  | 119.8(4) |
| C(35)-C(36)-C(37)  | 120.3(4) | C(42)-C(41)-P(2)   | 121.4(3) |
| C(35)-C(36)-H(36A) | 119.8    | C(46)-C(41)-P(2)   | 118.6(3) |
| C(37)-C(36)-H(36A) | 119.8    | C(41)-C(42)-C(43)  | 119.5(4) |
| C(38)-C(37)-C(36)  | 119.5(4) | C(41)-C(42)-H(42A) | 120.3    |
| C(38)-C(37)-H(37A) | 120.2    | C(43)-C(42)-H(42A) | 120.3    |
| C(36)-C(37)-H(37A) | 120.2    | C(44)-C(43)-C(42)  | 121.0(4) |
| C(37)-C(38)-C(39)  | 119.5(4) | C(44)-C(43)-H(43A) | 119.5    |
| C(37)-C(38)-H(38A) | 120.2    | C(42)-C(43)-H(43A) | 119.5    |
| C(39)-C(38)-H(38A) | 120.2    | C(45)-C(44)-C(43)  | 119.7(4) |
| C(40)-C(39)-C(38)  | 120.6(4) | C(45)-C(44)-H(44A) | 120.1    |
| C(40)-C(39)-H(39A) | 119.7    | C(43)-C(44)-H(44A) | 120.1    |
| C(38)-C(39)-H(39A) | 119.7    | C(44)-C(45)-C(46)  | 119.8(4) |
| C(39)-C(40)-C(35)  | 120.0(4) | C(44)-C(45)-H(45A) | 120.1    |
| C(39)-C(40)-H(40A) | 120.0    | C(46)-C(45)-H(45A) | 120.1    |
| C(35)-C(40)-H(40A) | 120.0    |                    |          |

Table S3. Torsion angles (°) for Au(C<sub>6</sub>Cl<sub>2</sub>F<sub>3</sub>)(PPh<sub>2</sub>py), **1**.

|                      |           |                         |           |
|----------------------|-----------|-------------------------|-----------|
| C(6)-C(1)-C(2)-F(1)  | 179.0(3)  | C(7)-C(8)-C(9)-C(10)    | -0.7(7)   |
| Au(1)-C(1)-C(2)-F(1) | -0.3(5)   | C(8)-C(9)-C(10)-C(11)   | 0.4(7)    |
| C(6)-C(1)-C(2)-C(3)  | -1.0(6)   | C(7)-N(1)-C(11)-C(10)   | -1.3(6)   |
| Au(1)-C(1)-C(2)-C(3) | 179.7(3)  | C(9)-C(10)-C(11)-N(1)   | 0.6(7)    |
| F(1)-C(2)-C(3)-C(4)  | -178.3(4) | C(18)-P(1)-C(12)-C(13)  | 47.9(3)   |
| C(1)-C(2)-C(3)-C(4)  | 1.8(7)    | C(7)-P(1)-C(12)-C(13)   | 159.5(3)  |
| F(1)-C(2)-C(3)-Cl(1) | 2.3(5)    | Au(1)-P(1)-C(12)-C(13)  | -79.0(3)  |
| C(1)-C(2)-C(3)-Cl(1) | -177.6(3) | C(18)-P(1)-C(12)-C(17)  | -136.1(3) |
| C(2)-C(3)-C(4)-F(2)  | 179.7(4)  | C(7)-P(1)-C(12)-C(17)   | -24.5(4)  |
| Cl(1)-C(3)-C(4)-F(2) | -0.9(6)   | Au(1)-P(1)-C(12)-C(17)  | 97.0(3)   |
| C(2)-C(3)-C(4)-C(5)  | -1.3(6)   | C(17)-C(12)-C(13)-C(14) | 0.6(5)    |
| Cl(1)-C(3)-C(4)-C(5) | 178.2(3)  | P(1)-C(12)-C(13)-C(14)  | 176.7(3)  |
| F(2)-C(4)-C(5)-C(6)  | 179.2(4)  | C(12)-C(13)-C(14)-C(15) | 0.7(6)    |
| C(3)-C(4)-C(5)-C(6)  | 0.1(6)    | C(13)-C(14)-C(15)-C(16) | -1.4(6)   |
| F(2)-C(4)-C(5)-Cl(2) | -1.4(5)   | C(14)-C(15)-C(16)-C(17) | 0.8(6)    |
| C(3)-C(4)-C(5)-Cl(2) | 179.5(3)  | C(15)-C(16)-C(17)-C(12) | 0.5(6)    |
| C(4)-C(5)-C(6)-F(3)  | -179.0(4) | C(13)-C(12)-C(17)-C(16) | -1.2(5)   |
| Cl(2)-C(5)-C(6)-F(3) | 1.6(5)    | P(1)-C(12)-C(17)-C(16)  | -177.1(3) |
| C(4)-C(5)-C(6)-C(1)  | 0.7(6)    | C(12)-P(1)-C(18)-C(23)  | 45.4(4)   |
| Cl(2)-C(5)-C(6)-C(1) | -178.7(3) | C(7)-P(1)-C(18)-C(23)   | -65.3(4)  |
| C(2)-C(1)-C(6)-F(3)  | 179.4(3)  | Au(1)-P(1)-C(18)-C(23)  | 171.3(3)  |
| Au(1)-C(1)-C(6)-F(3) | -1.3(5)   | C(12)-P(1)-C(18)-C(19)  | -135.3(3) |
| C(2)-C(1)-C(6)-C(5)  | -0.3(6)   | C(7)-P(1)-C(18)-C(19)   | 114.0(3)  |
| Au(1)-C(1)-C(6)-C(5) | 179.0(3)  | Au(1)-P(1)-C(18)-C(19)  | -9.4(4)   |
| C(11)-N(1)-C(7)-C(8) | 1.0(6)    | C(23)-C(18)-C(19)-C(20) | 1.9(6)    |
| C(11)-N(1)-C(7)-P(1) | 179.9(3)  | P(1)-C(18)-C(19)-C(20)  | -177.4(3) |
| C(18)-P(1)-C(7)-N(1) | 50.7(4)   | C(18)-C(19)-C(20)-C(21) | -1.2(6)   |
| C(12)-P(1)-C(7)-N(1) | -59.5(4)  | C(19)-C(20)-C(21)-C(22) | -0.8(7)   |
| Au(1)-P(1)-C(7)-N(1) | 176.9(3)  | C(20)-C(21)-C(22)-C(23) | 2.0(7)    |
| C(18)-P(1)-C(7)-C(8) | -130.3(3) | C(19)-C(18)-C(23)-C(22) | -0.7(6)   |
| C(12)-P(1)-C(7)-C(8) | 119.5(3)  | P(1)-C(18)-C(23)-C(22)  | 178.5(3)  |
| Au(1)-P(1)-C(7)-C(8) | -4.1(4)   | C(21)-C(22)-C(23)-C(18) | -1.2(7)   |
| N(1)-C(7)-C(8)-C(9)  | 0.0(7)    | C(29)-C(24)-C(25)-F(4)  | -179.6(3) |
| P(1)-C(7)-C(8)-C(9)  | -178.9(3) | Au(2)-C(24)-C(25)-F(4)  | 4.8(6)    |

|                         |           |                         |           |
|-------------------------|-----------|-------------------------|-----------|
| C(29)-C(24)-C(25)-C(26) | 1.8(6)    | C(30)-C(31)-C(32)-C(33) | 1.3(8)    |
| Au(2)-C(24)-C(25)-C(26) | -173.8(3) | C(31)-C(32)-C(33)-C(34) | -1.0(8)   |
| F(4)-C(25)-C(26)-C(27)  | 179.6(4)  | C(32)-C(33)-C(34)-N(2)  | 0.3(8)    |
| C(24)-C(25)-C(26)-C(27) | -1.8(6)   | C(30)-N(2)-C(34)-C(33)  | 0.1(7)    |
| F(4)-C(25)-C(26)-Cl(3)  | -0.3(5)   | C(41)-P(2)-C(35)-C(40)  | -42.0(4)  |
| C(24)-C(25)-C(26)-Cl(3) | 178.3(3)  | C(30)-P(2)-C(35)-C(40)  | -152.0(3) |
| C(25)-C(26)-C(27)-F(5)  | -179.6(4) | Au(2)-P(2)-C(35)-C(40)  | 86.5(3)   |
| Cl(3)-C(26)-C(27)-F(5)  | 0.3(6)    | C(41)-P(2)-C(35)-C(36)  | 144.4(3)  |
| C(25)-C(26)-C(27)-C(28) | 0.4(6)    | C(30)-P(2)-C(35)-C(36)  | 34.3(4)   |
| Cl(3)-C(26)-C(27)-C(28) | -179.7(3) | Au(2)-P(2)-C(35)-C(36)  | -87.1(3)  |
| F(5)-C(27)-C(28)-C(29)  | -179.2(4) | C(40)-C(35)-C(36)-C(37) | -0.7(6)   |
| C(26)-C(27)-C(28)-C(29) | 0.8(6)    | P(2)-C(35)-C(36)-C(37)  | 172.8(3)  |
| F(5)-C(27)-C(28)-Cl(4)  | 0.3(6)    | C(35)-C(36)-C(37)-C(38) | 0.2(7)    |
| C(26)-C(27)-C(28)-Cl(4) | -179.7(3) | C(36)-C(37)-C(38)-C(39) | 0.7(7)    |
| C(25)-C(24)-C(29)-F(6)  | 179.8(3)  | C(37)-C(38)-C(39)-C(40) | -1.1(7)   |
| Au(2)-C(24)-C(29)-F(6)  | -4.3(5)   | C(38)-C(39)-C(40)-C(35) | 0.5(6)    |
| C(25)-C(24)-C(29)-C(28) | -0.4(6)   | C(36)-C(35)-C(40)-C(39) | 0.4(6)    |
| Au(2)-C(24)-C(29)-C(28) | 175.5(3)  | P(2)-C(35)-C(40)-C(39)  | -173.3(3) |
| C(27)-C(28)-C(29)-F(6)  | 179.0(3)  | C(45)-C(46)-C(41)-C(42) | -1.6(6)   |
| Cl(4)-C(28)-C(29)-F(6)  | -0.5(5)   | C(45)-C(46)-C(41)-P(2)  | 173.6(3)  |
| C(27)-C(28)-C(29)-C(24) | -0.8(6)   | C(35)-P(2)-C(41)-C(42)  | -41.3(3)  |
| Cl(4)-C(28)-C(29)-C(24) | 179.7(3)  | C(30)-P(2)-C(41)-C(42)  | 69.7(3)   |
| C(34)-N(2)-C(30)-C(31)  | 0.1(6)    | Au(2)-P(2)-C(41)-C(42)  | -169.6(3) |
| C(34)-N(2)-C(30)-P(2)   | 176.5(3)  | C(35)-P(2)-C(41)-C(46)  | 143.6(3)  |
| C(35)-P(2)-C(30)-C(31)  | -132.3(4) | C(30)-P(2)-C(41)-C(46)  | -105.5(3) |
| C(41)-P(2)-C(30)-C(31)  | 116.2(4)  | Au(2)-P(2)-C(41)-C(46)  | 15.3(3)   |
| Au(2)-P(2)-C(30)-C(31)  | -7.8(4)   | C(46)-C(41)-C(42)-C(43) | 0.3(6)    |
| C(35)-P(2)-C(30)-N(2)   | 51.1(4)   | P(2)-C(41)-C(42)-C(43)  | -174.8(3) |
| C(41)-P(2)-C(30)-N(2)   | -60.3(3)  | C(41)-C(42)-C(43)-C(44) | 1.1(7)    |
| Au(2)-P(2)-C(30)-N(2)   | 175.6(3)  | C(42)-C(43)-C(44)-C(45) | -1.1(7)   |
| N(2)-C(30)-C(31)-C(32)  | -0.8(7)   | C(43)-C(44)-C(45)-C(46) | -0.2(6)   |
| P(2)-C(30)-C(31)-C(32)  | -177.1(4) | C(41)-C(46)-C(45)-C(44) | 1.6(6)    |

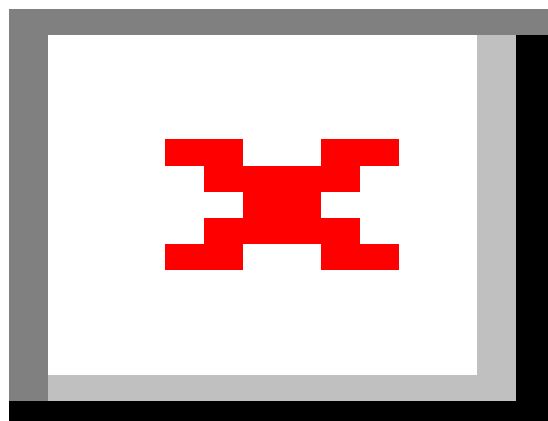

**Figure S2.** Thermal ellipsoid plot (50%) of  $\text{Au}_2(\text{C}_6\text{Cl}_2\text{F}_3)_2(\text{P}_2\text{phen})$ , **2**. Only one-half of the molecules crystallizes in the asymmetric unit.



Table S4. X-ray crystallographic information for Au<sub>2</sub>(C<sub>6</sub>Cl<sub>2</sub>F<sub>3</sub>)<sub>2</sub>(P<sub>2</sub>phen), **2**.

|                                   |                                                                                                              |                   |
|-----------------------------------|--------------------------------------------------------------------------------------------------------------|-------------------|
| Identification code               | cat12                                                                                                        |                   |
| Empirical formula                 | C <sub>48</sub> H <sub>26</sub> Au <sub>2</sub> Cl <sub>4</sub> F <sub>6</sub> N <sub>2</sub> P <sub>2</sub> |                   |
| Formula weight                    | 1342.38                                                                                                      |                   |
| Temperature                       | 100(2) K                                                                                                     |                   |
| Wavelength                        | 0.71073 Å                                                                                                    |                   |
| Crystal system                    | Monoclinic                                                                                                   |                   |
| Space group                       | C2/c                                                                                                         |                   |
| Unit cell dimensions              | a = 24.6243(7) Å                                                                                             | α = 90°.          |
|                                   | b = 12.2228(4) Å                                                                                             | β = 123.7960(6)°. |
|                                   | c = 17.6926(9) Å                                                                                             | γ = 90°.          |
| Volume                            | 4425.3(3) Å <sup>3</sup>                                                                                     |                   |
| Z                                 | 4                                                                                                            |                   |
| Density (calculated)              | 2.015 Mg/m <sup>3</sup>                                                                                      |                   |
| Absorption coefficient            | 7.001 mm <sup>-1</sup>                                                                                       |                   |
| F(000)                            | 2552                                                                                                         |                   |
| Crystal size                      | 0.400 x 0.080 x 0.050 mm <sup>3</sup>                                                                        |                   |
| Theta range for data collection   | 1.941 to 29.997°.                                                                                            |                   |
| Index ranges                      | -33 ≤ h ≤ 34, -17 ≤ k ≤ 16, -24 ≤ l ≤ 24                                                                     |                   |
| Reflections collected             | 40972                                                                                                        |                   |
| Independent reflections           | 6470 [R(int) = 0.0664]                                                                                       |                   |
| Completeness to theta = 25.242°   | 100.0 %                                                                                                      |                   |
| Absorption correction             | Semi-empirical from equivalents                                                                              |                   |
| Refinement method                 | Full-matrix least-squares on F <sup>2</sup>                                                                  |                   |
| Data / restraints / parameters    | 6470 / 0 / 289                                                                                               |                   |
| Goodness-of-fit on F <sup>2</sup> | 1.007                                                                                                        |                   |
| Final R indices [I > 2σ(I)]       | R1 = 0.0279, wR2 = 0.0470                                                                                    |                   |
| R indices (all data)              | R1 = 0.0457, wR2 = 0.0500                                                                                    |                   |
| Extinction coefficient            | n/a                                                                                                          |                   |
| Largest diff. peak and hole       | 0.909 and -0.701 e.Å <sup>-3</sup>                                                                           |                   |

Table S5. Selected bond distances (Å) and angles (°) for Au<sub>2</sub>(C<sub>6</sub>Cl<sub>2</sub>F<sub>3</sub>)<sub>2</sub>(P<sub>2</sub>phen), **2**.

|            |           |               |          |
|------------|-----------|---------------|----------|
| Au(1)-C(1) | 2.054(3)  |               |          |
| Au(1)-P(1) | 2.2750(8) | C(8)-H(8A)    | 0.9500   |
| P(1)-C(19) | 1.807(3)  | C(9)-C(10)    | 1.403(4) |
| P(1)-C(13) | 1.814(3)  | C(9)-H(9A)    | 0.9500   |
| P(1)-C(7)  | 1.839(3)  | C(10)-C(11)   | 1.417(4) |
| Cl(1)-C(3) | 1.718(3)  | C(10)-C(12)   | 1.436(4) |
| Cl(2)-C(5) | 1.725(3)  | C(11)-C(11)#1 | 1.471(6) |
| F(1)-C(2)  | 1.358(3)  | C(12)-C(12)#1 | 1.342(6) |
| F(2)-C(4)  | 1.348(3)  | C(12)-H(12A)  | 0.9500   |
| F(3)-C(6)  | 1.352(4)  | C(13)-C(14)   | 1.393(4) |
| N(1)-C(7)  | 1.330(4)  | C(13)-C(18)   | 1.401(4) |
| N(1)-C(11) | 1.351(4)  | C(14)-C(15)   | 1.385(5) |
| C(1)-C(2)  | 1.371(4)  | C(14)-H(14A)  | 0.9500   |
| C(1)-C(6)  | 1.388(4)  | C(15)-C(16)   | 1.389(5) |
| C(2)-C(3)  | 1.383(4)  | C(15)-H(15A)  | 0.9500   |
| C(3)-C(4)  | 1.388(5)  | C(16)-C(17)   | 1.383(5) |
| C(4)-C(5)  | 1.371(5)  | C(16)-H(16A)  | 0.9500   |
| C(5)-C(6)  | 1.388(4)  | C(17)-C(18)   | 1.385(4) |
| C(7)-C(8)  | 1.406(4)  | C(17)-H(17A)  | 0.9500   |
| C(8)-C(9)  | 1.367(4)  | C(18)-H(18A)  | 0.9500   |

|                  |            |                      |            |
|------------------|------------|----------------------|------------|
| C(19)-C(24)      | 1.392(4)   | C(10)-C(9)-H(9A)     | 120.3      |
| C(19)-C(20)      | 1.394(4)   | C(9)-C(10)-C(11)     | 117.6(3)   |
| C(20)-C(21)      | 1.387(4)   | C(9)-C(10)-C(12)     | 121.5(3)   |
| C(20)-H(20A)     | 0.9500     | C(11)-C(10)-C(12)    | 120.9(3)   |
| C(21)-C(22)      | 1.382(5)   | N(1)-C(11)-C(10)     | 122.8(3)   |
| C(21)-H(21A)     | 0.9500     | N(1)-C(11)-C(11)#1   | 118.94(16) |
| C(22)-C(23)      | 1.384(5)   | C(10)-C(11)-C(11)#1  | 118.24(17) |
| C(22)-H(22A)     | 0.9500     | C(12)#1-C(12)-C(10)  | 120.80(18) |
| C(23)-C(24)      | 1.387(4)   | C(12)#1-C(12)-H(12A) | 119.6      |
| C(23)-H(23A)     | 0.9500     | C(10)-C(12)-H(12A)   | 119.6      |
| C(24)-H(24A)     | 0.9500     | C(14)-C(13)-C(18)    | 119.1(3)   |
|                  |            | C(14)-C(13)-P(1)     | 124.2(2)   |
| C(1)-Au(1)-P(1)  | 174.87(9)  | C(18)-C(13)-P(1)     | 116.7(2)   |
| C(19)-P(1)-C(13) | 105.48(14) | C(15)-C(14)-C(13)    | 120.3(3)   |
| C(19)-P(1)-C(7)  | 106.58(14) | C(15)-C(14)-H(14A)   | 119.9      |
| C(13)-P(1)-C(7)  | 106.44(14) | C(13)-C(14)-H(14A)   | 119.9      |
| C(19)-P(1)-Au(1) | 115.29(10) | C(14)-C(15)-C(16)    | 120.3(3)   |
| C(13)-P(1)-Au(1) | 112.54(10) | C(14)-C(15)-H(15A)   | 119.9      |
| C(7)-P(1)-Au(1)  | 109.95(10) | C(16)-C(15)-H(15A)   | 119.9      |
| C(7)-N(1)-C(11)  | 117.8(3)   | C(17)-C(16)-C(15)    | 119.9(3)   |
| C(2)-C(1)-C(6)   | 114.6(3)   | C(17)-C(16)-H(16A)   | 120.1      |
| C(2)-C(1)-Au(1)  | 121.2(2)   | C(15)-C(16)-H(16A)   | 120.1      |
| C(6)-C(1)-Au(1)  | 124.1(2)   | C(16)-C(17)-C(18)    | 120.2(3)   |
| F(1)-C(2)-C(1)   | 118.4(3)   | C(16)-C(17)-H(17A)   | 119.9      |
| F(1)-C(2)-C(3)   | 116.4(3)   | C(18)-C(17)-H(17A)   | 119.9      |
| C(1)-C(2)-C(3)   | 125.3(3)   | C(17)-C(18)-C(13)    | 120.2(3)   |
| C(2)-C(3)-C(4)   | 116.8(3)   | C(17)-C(18)-H(18A)   | 119.9      |
| C(2)-C(3)-Cl(1)  | 122.1(3)   | C(13)-C(18)-H(18A)   | 119.9      |
| C(4)-C(3)-Cl(1)  | 121.1(2)   | C(24)-C(19)-C(20)    | 119.6(3)   |
| F(2)-C(4)-C(5)   | 119.3(3)   | C(24)-C(19)-P(1)     | 121.5(2)   |
| F(2)-C(4)-C(3)   | 119.2(3)   | C(20)-C(19)-P(1)     | 118.9(2)   |
| C(5)-C(4)-C(3)   | 121.6(3)   | C(21)-C(20)-C(19)    | 120.3(3)   |
| C(4)-C(5)-C(6)   | 118.1(3)   | C(21)-C(20)-H(20A)   | 119.9      |
| C(4)-C(5)-Cl(2)  | 120.7(2)   | C(19)-C(20)-H(20A)   | 119.9      |
| C(6)-C(5)-Cl(2)  | 121.2(3)   | C(22)-C(21)-C(20)    | 119.5(3)   |
| F(3)-C(6)-C(1)   | 118.9(3)   | C(22)-C(21)-H(21A)   | 120.3      |
| F(3)-C(6)-C(5)   | 117.4(3)   | C(20)-C(21)-H(21A)   | 120.3      |
| C(1)-C(6)-C(5)   | 123.7(3)   | C(21)-C(22)-C(23)    | 120.8(3)   |
| N(1)-C(7)-C(8)   | 123.2(3)   | C(21)-C(22)-H(22A)   | 119.6      |
| N(1)-C(7)-P(1)   | 118.3(2)   | C(23)-C(22)-H(22A)   | 119.6      |
| C(8)-C(7)-P(1)   | 118.5(2)   | C(22)-C(23)-C(24)    | 119.9(3)   |
| C(9)-C(8)-C(7)   | 119.1(3)   | C(22)-C(23)-H(23A)   | 120.0      |
| C(9)-C(8)-H(8A)  | 120.4      | C(24)-C(23)-H(23A)   | 120.0      |
| C(7)-C(8)-H(8A)  | 120.4      | C(23)-C(24)-C(19)    | 119.9(3)   |
| C(8)-C(9)-C(10)  | 119.4(3)   | C(23)-C(24)-H(24A)   | 120.0      |
| C(8)-C(9)-H(9A)  | 120.3      | C(19)-C(24)-H(24A)   | 120.0      |

---

Symmetry transformations used to generate equivalent atoms:

#1 -x,y,-z+1/2

Table S6. Torsion angles (°) for Au<sub>2</sub>(C<sub>6</sub>Cl<sub>2</sub>F<sub>3</sub>)<sub>2</sub>(P<sub>2</sub>phen), **2**.

|                       |           |                           |           |
|-----------------------|-----------|---------------------------|-----------|
| C(6)-C(1)-C(2)-F(1)   | -179.7(3) | C(7)-N(1)-C(11)-C(10)     | 0.7(4)    |
| Au(1)-C(1)-C(2)-F(1)  | -3.0(4)   | C(7)-N(1)-C(11)-C(11)#1   | -178.8(3) |
| C(6)-C(1)-C(2)-C(3)   | 0.0(5)    | C(9)-C(10)-C(11)-N(1)     | 1.4(4)    |
| Au(1)-C(1)-C(2)-C(3)  | 176.6(2)  | C(12)-C(10)-C(11)-N(1)    | -177.4(3) |
| F(1)-C(2)-C(3)-C(4)   | 179.8(3)  | C(9)-C(10)-C(11)-C(11)#1  | -179.0(3) |
| C(1)-C(2)-C(3)-C(4)   | 0.1(5)    | C(12)-C(10)-C(11)-C(11)#1 | 2.1(5)    |
| F(1)-C(2)-C(3)-Cl(1)  | 0.9(4)    | C(9)-C(10)-C(12)-C(12)#1  | -178.3(4) |
| C(1)-C(2)-C(3)-Cl(1)  | -178.7(3) | C(11)-C(10)-C(12)-C(12)#1 | 0.5(5)    |
| C(2)-C(3)-C(4)-F(2)   | -178.6(3) | C(19)-P(1)-C(13)-C(14)    | -92.8(3)  |
| Cl(1)-C(3)-C(4)-F(2)  | 0.3(4)    | C(7)-P(1)-C(13)-C(14)     | 20.2(3)   |
| C(2)-C(3)-C(4)-C(5)   | -0.8(5)   | Au(1)-P(1)-C(13)-C(14)    | 140.7(3)  |
| Cl(1)-C(3)-C(4)-C(5)  | 178.1(2)  | C(19)-P(1)-C(13)-C(18)    | 87.4(3)   |
| F(2)-C(4)-C(5)-C(6)   | 179.0(3)  | C(7)-P(1)-C(13)-C(18)     | -159.6(2) |
| C(3)-C(4)-C(5)-C(6)   | 1.2(5)    | Au(1)-P(1)-C(13)-C(18)    | -39.1(3)  |
| F(2)-C(4)-C(5)-Cl(2)  | 1.6(4)    | C(18)-C(13)-C(14)-C(15)   | 0.6(5)    |
| C(3)-C(4)-C(5)-Cl(2)  | -176.3(3) | P(1)-C(13)-C(14)-C(15)    | -179.2(3) |
| C(2)-C(1)-C(6)-F(3)   | 178.5(3)  | C(13)-C(14)-C(15)-C(16)   | -0.9(5)   |
| Au(1)-C(1)-C(6)-F(3)  | 2.0(4)    | C(14)-C(15)-C(16)-C(17)   | 0.5(5)    |
| C(2)-C(1)-C(6)-C(5)   | 0.5(5)    | C(15)-C(16)-C(17)-C(18)   | 0.2(5)    |
| Au(1)-C(1)-C(6)-C(5)  | -176.0(2) | C(16)-C(17)-C(18)-C(13)   | -0.5(5)   |
| C(4)-C(5)-C(6)-F(3)   | -179.1(3) | C(14)-C(13)-C(18)-C(17)   | 0.1(5)    |
| Cl(2)-C(5)-C(6)-F(3)  | -1.6(4)   | P(1)-C(13)-C(18)-C(17)    | 179.9(2)  |
| C(4)-C(5)-C(6)-C(1)   | -1.1(5)   | C(13)-P(1)-C(19)-C(24)    | 41.7(3)   |
| Cl(2)-C(5)-C(6)-C(1)  | 176.3(3)  | C(7)-P(1)-C(19)-C(24)     | -71.1(3)  |
| C(11)-N(1)-C(7)-C(8)  | -2.4(4)   | Au(1)-P(1)-C(19)-C(24)    | 166.5(2)  |
| C(11)-N(1)-C(7)-P(1)  | 177.8(2)  | C(13)-P(1)-C(19)-C(20)    | -138.8(3) |
| C(19)-P(1)-C(7)-N(1)  | 50.6(3)   | C(7)-P(1)-C(19)-C(20)     | 108.3(3)  |
| C(13)-P(1)-C(7)-N(1)  | -61.7(3)  | Au(1)-P(1)-C(19)-C(20)    | -14.0(3)  |
| Au(1)-P(1)-C(7)-N(1)  | 176.2(2)  | C(24)-C(19)-C(20)-C(21)   | 1.2(5)    |
| C(19)-P(1)-C(7)-C(8)  | -129.3(2) | P(1)-C(19)-C(20)-C(21)    | -178.3(3) |
| C(13)-P(1)-C(7)-C(8)  | 118.5(3)  | C(19)-C(20)-C(21)-C(22)   | -0.6(5)   |
| Au(1)-P(1)-C(7)-C(8)  | -3.7(3)   | C(20)-C(21)-C(22)-C(23)   | -0.6(5)   |
| N(1)-C(7)-C(8)-C(9)   | 1.8(5)    | C(21)-C(22)-C(23)-C(24)   | 1.2(5)    |
| P(1)-C(7)-C(8)-C(9)   | -178.3(2) | C(22)-C(23)-C(24)-C(19)   | -0.5(5)   |
| C(7)-C(8)-C(9)-C(10)  | 0.5(5)    | C(20)-C(19)-C(24)-C(23)   | -0.6(5)   |
| C(8)-C(9)-C(10)-C(11) | -2.0(4)   | P(1)-C(19)-C(24)-C(23)    | 178.8(3)  |
| C(8)-C(9)-C(10)-C(12) | 176.9(3)  |                           |           |

Symmetry transformations used to generate equivalent atoms:

#1 -x,y,-z+1/2

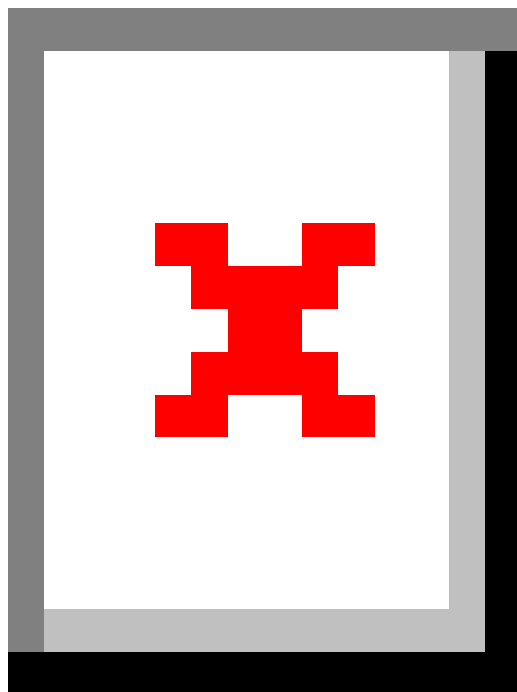

**Figure S3.** Thermal ellipsoid plot (50%) of  $[\text{Au}_2\text{Cu}(\text{C}_6\text{Cl}_2\text{F}_3)_2(\text{PPh}_2\text{py})_2](\text{BF}_4) \mathbf{3}$ .

Table S7. X-ray crystallographic data for  $[\text{Au}_2\text{Cu}(\text{C}_6\text{Cl}_2\text{F}_3)_2(\text{PPh}_2\text{py})_2](\text{BF}_4)$ , **3**.

|                                   |                                                                                        |                               |
|-----------------------------------|----------------------------------------------------------------------------------------|-------------------------------|
| Identification code               | cat8_0m                                                                                |                               |
| Empirical formula                 | $\text{C}_{46}\text{H}_{28}\text{Au}_2\text{BCl}_4\text{CuF}_{10}\text{N}_2\text{P}_2$ |                               |
| Formula weight                    | 1470.73                                                                                |                               |
| Temperature                       | 100(2) K                                                                               |                               |
| Wavelength                        | 0.71073 Å                                                                              |                               |
| Crystal system                    | Triclinic                                                                              |                               |
| Space group                       | P-1                                                                                    |                               |
| Unit cell dimensions              | a = 10.3133(3) Å                                                                       | $\alpha = 90.0760(10)^\circ$  |
|                                   | b = 13.8966(5) Å                                                                       | $\beta = 95.0190(10)^\circ$   |
|                                   | c = 16.5360(6) Å                                                                       | $\gamma = 104.8460(10)^\circ$ |
| Volume                            | 2281.35(13) Å <sup>3</sup>                                                             |                               |
| Z                                 | 2                                                                                      |                               |
| Density (calculated)              | 2.141 Mg/m <sup>3</sup>                                                                |                               |
| Absorption coefficient            | 7.261 mm <sup>-1</sup>                                                                 |                               |
| F(000)                            | 1396                                                                                   |                               |
| Crystal size                      | 0.340 x 0.330 x 0.220 mm <sup>3</sup>                                                  |                               |
| Theta range for data collection   | 1.516 to 31.500°                                                                       |                               |
| Index ranges                      | -14 ≤ h ≤ 15, -20 ≤ k ≤ 20, -24 ≤ l ≤ 24                                               |                               |
| Reflections collected             | 49768                                                                                  |                               |
| Independent reflections           | 15057 [R(int) = 0.0423]                                                                |                               |
| Completeness to theta = 25.242°   | 100.0 %                                                                                |                               |
| Absorption correction             | Semi-empirical from equivalents                                                        |                               |
| Refinement method                 | Full-matrix least-squares on F <sup>2</sup>                                            |                               |
| Data / restraints / parameters    | 15057 / 0 / 613                                                                        |                               |
| Goodness-of-fit on F <sup>2</sup> | 1.081                                                                                  |                               |
| Final R indices [I > 2σ(I)]       | R1 = 0.0372, wR2 = 0.0808                                                              |                               |
| R indices (all data)              | R1 = 0.0547, wR2 = 0.0850                                                              |                               |
| Extinction coefficient            | n/a                                                                                    |                               |
| Largest diff. peak and hole       | 6.583 and -2.710 e.Å <sup>-3</sup>                                                     |                               |

Table S8. Bond distances (Å) and angles (°) for [Au<sub>2</sub>Cu(C<sub>6</sub>Cl<sub>2</sub>F<sub>3</sub>)<sub>2</sub>(PPh<sub>2</sub>py)<sub>2</sub>](BF<sub>4</sub>), **3**.

|              |            |              |          |
|--------------|------------|--------------|----------|
| Au(1)-C(1)   | 2.056(4)   | C(15)-C(16)  | 1.384(7) |
| Au(1)-P(1)   | 2.2916(11) | C(15)-H(15A) | 0.9500   |
| Au(1)-Cu(1)  | 2.9647(6)  | C(16)-C(17)  | 1.382(6) |
| Au(1)-Au(2)  | 3.0689(2)  | C(16)-H(16A) | 0.9500   |
| Au(2)-C(24)  | 2.068(4)   | C(17)-H(17A) | 0.9500   |
| Au(2)-P(2)   | 2.2988(10) | C(18)-C(23)  | 1.388(6) |
| Au(2)-Cu(1)  | 2.8403(5)  | C(18)-C(19)  | 1.401(6) |
| Cu(1)-N(2)   | 1.907(4)   | C(19)-C(20)  | 1.392(7) |
| Cu(1)-N(1)   | 1.908(3)   | C(19)-H(19A) | 0.9500   |
| Cl(1)-C(3)   | 1.710(5)   | C(20)-C(21)  | 1.368(7) |
| Cl(2)-C(5)   | 1.729(5)   | C(20)-H(20A) | 0.9500   |
| Cl(3)-C(26)  | 1.725(5)   | C(21)-C(22)  | 1.383(7) |
| Cl(4)-C(28)  | 1.726(5)   | C(21)-H(21A) | 0.9500   |
| F(1)-C(2)    | 1.359(5)   | C(22)-C(23)  | 1.386(6) |
| F(2)-C(4)    | 1.344(5)   | C(22)-H(22A) | 0.9500   |
| F(3)-C(6)    | 1.352(5)   | C(23)-H(23A) | 0.9500   |
| F(4)-C(25)   | 1.344(5)   | C(24)-C(25)  | 1.376(6) |
| F(5)-C(27)   | 1.342(5)   | C(24)-C(29)  | 1.392(6) |
| F(6)-C(29)   | 1.353(5)   | C(25)-C(26)  | 1.397(6) |
| B(1)-F(7)    | 1.356(7)   | C(26)-C(27)  | 1.381(7) |
| B(1)-F(10)   | 1.374(7)   | C(27)-C(28)  | 1.368(7) |
| B(1)-F(8)    | 1.377(7)   | C(28)-C(29)  | 1.392(6) |
| B(1)-F(9)    | 1.432(8)   | C(30)-C(31)  | 1.379(6) |
| P(1)-C(18)   | 1.812(4)   | C(31)-C(32)  | 1.397(7) |
| P(1)-C(12)   | 1.817(5)   | C(31)-H(31A) | 0.9500   |
| P(1)-C(7)    | 1.841(4)   | C(32)-C(33)  | 1.383(7) |
| P(2)-C(41)   | 1.815(4)   | C(32)-H(32A) | 0.9500   |
| P(2)-C(35)   | 1.816(4)   | C(33)-C(34)  | 1.383(7) |
| P(2)-C(30)   | 1.835(4)   | C(33)-H(33A) | 0.9500   |
| N(1)-C(11)   | 1.342(6)   | C(34)-H(34A) | 0.9500   |
| N(1)-C(7)    | 1.357(5)   | C(35)-C(40)  | 1.397(6) |
| N(2)-C(34)   | 1.346(6)   | C(35)-C(36)  | 1.408(6) |
| N(2)-C(30)   | 1.358(5)   | C(36)-C(37)  | 1.394(6) |
| C(1)-C(2)    | 1.349(6)   | C(36)-H(36A) | 0.9500   |
| C(1)-C(6)    | 1.418(6)   | C(37)-C(38)  | 1.388(6) |
| C(2)-C(3)    | 1.401(6)   | C(37)-H(37A) | 0.9500   |
| C(3)-C(4)    | 1.381(7)   | C(38)-C(39)  | 1.388(6) |
| C(4)-C(5)    | 1.367(7)   | C(38)-H(38A) | 0.9500   |
| C(5)-C(6)    | 1.386(6)   | C(39)-C(40)  | 1.390(6) |
| C(7)-C(8)    | 1.379(6)   | C(39)-H(39A) | 0.9500   |
| C(8)-C(9)    | 1.386(7)   | C(40)-H(40A) | 0.9500   |
| C(8)-H(8A)   | 0.9500     | C(41)-C(42)  | 1.399(6) |
| C(9)-C(10)   | 1.373(7)   | C(41)-C(46)  | 1.400(6) |
| C(9)-H(9A)   | 0.9500     | C(42)-C(43)  | 1.383(6) |
| C(10)-C(11)  | 1.389(7)   | C(42)-H(42A) | 0.9500   |
| C(10)-H(10A) | 0.9500     | C(43)-C(44)  | 1.399(6) |
| C(11)-H(11A) | 0.9500     | C(43)-H(43A) | 0.9500   |
| C(12)-C(13)  | 1.394(6)   | C(44)-C(45)  | 1.381(6) |
| C(12)-C(17)  | 1.402(6)   | C(44)-H(44A) | 0.9500   |
| C(13)-C(14)  | 1.380(7)   | C(45)-C(46)  | 1.385(6) |
| C(13)-H(13A) | 0.9500     | C(45)-H(45A) | 0.9500   |
| C(14)-C(15)  | 1.392(7)   | C(46)-H(46A) | 0.9500   |
| C(14)-H(14A) | 0.9500     |              |          |

|                   |            |                    |          |
|-------------------|------------|--------------------|----------|
| C(1)-Au(1)-P(1)   | 167.99(12) | C(6)-C(5)-Cl(2)    | 122.1(4) |
| C(1)-Au(1)-Cu(1)  | 115.32(12) | F(3)-C(6)-C(5)     | 116.3(4) |
| P(1)-Au(1)-Cu(1)  | 71.00(3)   | F(3)-C(6)-C(1)     | 119.4(4) |
| C(1)-Au(1)-Au(2)  | 89.07(11)  | C(5)-C(6)-C(1)     | 124.2(4) |
| P(1)-Au(1)-Au(2)  | 102.78(3)  | N(1)-C(7)-C(8)     | 122.3(4) |
| Cu(1)-Au(1)-Au(2) | 56.134(11) | N(1)-C(7)-P(1)     | 114.0(3) |
| C(24)-Au(2)-P(2)  | 172.24(12) | C(8)-C(7)-P(1)     | 123.5(3) |
| C(24)-Au(2)-Cu(1) | 105.48(11) | C(7)-C(8)-C(9)     | 119.2(5) |
| P(2)-Au(2)-Cu(1)  | 76.38(3)   | C(7)-C(8)-H(8A)    | 120.4    |
| C(24)-Au(2)-Au(1) | 89.02(11)  | C(9)-C(8)-H(8A)    | 120.4    |
| P(2)-Au(2)-Au(1)  | 98.34(3)   | C(10)-C(9)-C(8)    | 118.7(4) |
| Cu(1)-Au(2)-Au(1) | 60.079(12) | C(10)-C(9)-H(9A)   | 120.6    |
| N(2)-Cu(1)-N(1)   | 166.92(16) | C(8)-C(9)-H(9A)    | 120.6    |
| N(2)-Cu(1)-Au(2)  | 97.80(11)  | C(9)-C(10)-C(11)   | 119.5(5) |
| N(1)-Cu(1)-Au(2)  | 95.06(11)  | C(9)-C(10)-H(10A)  | 120.3    |
| N(2)-Cu(1)-Au(1)  | 89.95(11)  | C(11)-C(10)-H(10A) | 120.3    |
| N(1)-Cu(1)-Au(1)  | 97.91(11)  | N(1)-C(11)-C(10)   | 122.3(5) |
| Au(2)-Cu(1)-Au(1) | 63.788(12) | N(1)-C(11)-H(11A)  | 118.8    |
| F(7)-B(1)-F(10)   | 113.4(5)   | C(10)-C(11)-H(11A) | 118.8    |
| F(7)-B(1)-F(8)    | 113.8(5)   | C(13)-C(12)-C(17)  | 118.9(4) |
| F(10)-B(1)-F(8)   | 112.1(5)   | C(13)-C(12)-P(1)   | 118.9(3) |
| F(7)-B(1)-F(9)    | 104.3(5)   | C(17)-C(12)-P(1)   | 122.1(3) |
| F(10)-B(1)-F(9)   | 105.5(5)   | C(14)-C(13)-C(12)  | 120.8(5) |
| F(8)-B(1)-F(9)    | 106.8(5)   | C(14)-C(13)-H(13A) | 119.6    |
| C(18)-P(1)-C(12)  | 110.4(2)   | C(12)-C(13)-H(13A) | 119.6    |
| C(18)-P(1)-C(7)   | 105.0(2)   | C(13)-C(14)-C(15)  | 119.8(5) |
| C(12)-P(1)-C(7)   | 100.34(19) | C(13)-C(14)-H(14A) | 120.1    |
| C(18)-P(1)-Au(1)  | 111.95(14) | C(15)-C(14)-H(14A) | 120.1    |
| C(12)-P(1)-Au(1)  | 110.98(15) | C(16)-C(15)-C(14)  | 119.8(4) |
| C(7)-P(1)-Au(1)   | 117.44(13) | C(16)-C(15)-H(15A) | 120.1    |
| C(41)-P(2)-C(35)  | 104.33(18) | C(14)-C(15)-H(15A) | 120.1    |
| C(41)-P(2)-C(30)  | 106.92(19) | C(17)-C(16)-C(15)  | 120.6(5) |
| C(35)-P(2)-C(30)  | 103.96(19) | C(17)-C(16)-H(16A) | 119.7    |
| C(41)-P(2)-Au(2)  | 114.25(14) | C(15)-C(16)-H(16A) | 119.7    |
| C(35)-P(2)-Au(2)  | 110.56(13) | C(16)-C(17)-C(12)  | 120.0(4) |
| C(30)-P(2)-Au(2)  | 115.72(14) | C(16)-C(17)-H(17A) | 120.0    |
| C(11)-N(1)-C(7)   | 117.9(4)   | C(12)-C(17)-H(17A) | 120.0    |
| C(11)-N(1)-Cu(1)  | 121.1(3)   | C(23)-C(18)-C(19)  | 119.0(4) |
| C(7)-N(1)-Cu(1)   | 120.9(3)   | C(23)-C(18)-P(1)   | 117.9(3) |
| C(34)-N(2)-C(30)  | 118.4(4)   | C(19)-C(18)-P(1)   | 123.1(3) |
| C(34)-N(2)-Cu(1)  | 117.3(3)   | C(20)-C(19)-C(18)  | 119.6(4) |
| C(30)-N(2)-Cu(1)  | 124.1(3)   | C(20)-C(19)-H(19A) | 120.2    |
| C(2)-C(1)-C(6)    | 113.1(4)   | C(18)-C(19)-H(19A) | 120.2    |
| C(2)-C(1)-Au(1)   | 120.9(3)   | C(21)-C(20)-C(19)  | 120.6(5) |
| C(6)-C(1)-Au(1)   | 125.5(3)   | C(21)-C(20)-H(20A) | 119.7    |
| C(1)-C(2)-F(1)    | 118.4(4)   | C(19)-C(20)-H(20A) | 119.7    |
| C(1)-C(2)-C(3)    | 125.8(4)   | C(20)-C(21)-C(22)  | 120.5(4) |
| F(1)-C(2)-C(3)    | 115.8(4)   | C(20)-C(21)-H(21A) | 119.8    |
| C(4)-C(3)-C(2)    | 117.7(4)   | C(22)-C(21)-H(21A) | 119.8    |
| C(4)-C(3)-Cl(1)   | 120.3(4)   | C(21)-C(22)-C(23)  | 119.6(4) |
| C(2)-C(3)-Cl(1)   | 122.0(4)   | C(21)-C(22)-H(22A) | 120.2    |
| F(2)-C(4)-C(5)    | 120.0(4)   | C(23)-C(22)-H(22A) | 120.2    |
| F(2)-C(4)-C(3)    | 119.4(4)   | C(22)-C(23)-C(18)  | 120.8(4) |
| C(5)-C(4)-C(3)    | 120.6(4)   | C(22)-C(23)-H(23A) | 119.6    |
| C(4)-C(5)-C(6)    | 118.5(4)   | C(18)-C(23)-H(23A) | 119.6    |
| C(4)-C(5)-Cl(2)   | 119.4(4)   | C(25)-C(24)-C(29)  | 114.0(4) |

|                    |          |                    |          |
|--------------------|----------|--------------------|----------|
| C(25)-C(24)-Au(2)  | 126.6(3) | C(36)-C(35)-P(2)   | 122.0(3) |
| C(29)-C(24)-Au(2)  | 119.5(3) | C(37)-C(36)-C(35)  | 119.5(4) |
| F(4)-C(25)-C(24)   | 119.0(4) | C(37)-C(36)-H(36A) | 120.3    |
| F(4)-C(25)-C(26)   | 116.5(4) | C(35)-C(36)-H(36A) | 120.3    |
| C(24)-C(25)-C(26)  | 124.5(4) | C(38)-C(37)-C(36)  | 120.3(4) |
| C(27)-C(26)-C(25)  | 117.7(4) | C(38)-C(37)-H(37A) | 119.9    |
| C(27)-C(26)-Cl(3)  | 120.7(4) | C(36)-C(37)-H(37A) | 119.9    |
| C(25)-C(26)-Cl(3)  | 121.6(4) | C(37)-C(38)-C(39)  | 120.4(4) |
| F(5)-C(27)-C(28)   | 119.9(5) | C(37)-C(38)-H(38A) | 119.8    |
| F(5)-C(27)-C(26)   | 118.8(5) | C(39)-C(38)-H(38A) | 119.8    |
| C(28)-C(27)-C(26)  | 121.3(4) | C(38)-C(39)-C(40)  | 119.9(4) |
| C(27)-C(28)-C(29)  | 117.9(4) | C(38)-C(39)-H(39A) | 120.0    |
| C(27)-C(28)-Cl(4)  | 120.0(4) | C(40)-C(39)-H(39A) | 120.0    |
| C(29)-C(28)-Cl(4)  | 122.2(4) | C(39)-C(40)-C(35)  | 120.3(4) |
| F(6)-C(29)-C(28)   | 116.3(4) | C(39)-C(40)-H(40A) | 119.9    |
| F(6)-C(29)-C(24)   | 119.2(4) | C(35)-C(40)-H(40A) | 119.9    |
| C(28)-C(29)-C(24)  | 124.5(4) | C(42)-C(41)-C(46)  | 119.2(4) |
| N(2)-C(30)-C(31)   | 121.7(4) | C(42)-C(41)-P(2)   | 122.9(3) |
| N(2)-C(30)-P(2)    | 114.5(3) | C(46)-C(41)-P(2)   | 117.7(3) |
| C(31)-C(30)-P(2)   | 123.8(3) | C(43)-C(42)-C(41)  | 120.2(4) |
| C(30)-C(31)-C(32)  | 119.3(4) | C(43)-C(42)-H(42A) | 119.9    |
| C(30)-C(31)-H(31A) | 120.4    | C(41)-C(42)-H(42A) | 119.9    |
| C(32)-C(31)-H(31A) | 120.4    | C(42)-C(43)-C(44)  | 120.1(4) |
| C(33)-C(32)-C(31)  | 119.2(4) | C(42)-C(43)-H(43A) | 119.9    |
| C(33)-C(32)-H(32A) | 120.4    | C(44)-C(43)-H(43A) | 119.9    |
| C(31)-C(32)-H(32A) | 120.4    | C(45)-C(44)-C(43)  | 119.9(4) |
| C(34)-C(33)-C(32)  | 118.5(4) | C(45)-C(44)-H(44A) | 120.0    |
| C(34)-C(33)-H(33A) | 120.8    | C(43)-C(44)-H(44A) | 120.0    |
| C(32)-C(33)-H(33A) | 120.8    | C(44)-C(45)-C(46)  | 120.2(4) |
| N(2)-C(34)-C(33)   | 123.0(4) | C(44)-C(45)-H(45A) | 119.9    |
| N(2)-C(34)-H(34A)  | 118.5    | C(46)-C(45)-H(45A) | 119.9    |
| C(33)-C(34)-H(34A) | 118.5    | C(45)-C(46)-C(41)  | 120.3(4) |
| C(40)-C(35)-C(36)  | 119.6(4) | C(45)-C(46)-H(46A) | 119.8    |
| C(40)-C(35)-P(2)   | 118.2(3) | C(41)-C(46)-H(46A) | 119.8    |



Table S9. Torsion angles (°) for [Au<sub>2</sub>Cu(C<sub>6</sub>Cl<sub>2</sub>F<sub>3</sub>)<sub>2</sub>(PPh<sub>2</sub>py)<sub>2</sub>](BF<sub>4</sub>), **3**.

|                         |           |                         |           |
|-------------------------|-----------|-------------------------|-----------|
| C(6)-C(1)-C(2)-F(1)     | -177.9(4) | P(1)-C(12)-C(17)-C(16)  | -176.4(3) |
| Au(1)-C(1)-C(2)-F(1)    | -5.4(6)   | C(12)-P(1)-C(18)-C(23)  | -145.5(3) |
| C(6)-C(1)-C(2)-C(3)     | 2.7(7)    | C(7)-P(1)-C(18)-C(23)   | 107.1(4)  |
| Au(1)-C(1)-C(2)-C(3)    | 175.2(4)  | Au(1)-P(1)-C(18)-C(23)  | -21.3(4)  |
| C(1)-C(2)-C(3)-C(4)     | -2.2(8)   | C(12)-P(1)-C(18)-C(19)  | 35.6(5)   |
| F(1)-C(2)-C(3)-C(4)     | 178.4(4)  | C(7)-P(1)-C(18)-C(19)   | -71.7(4)  |
| C(1)-C(2)-C(3)-Cl(1)    | 178.0(4)  | Au(1)-P(1)-C(18)-C(19)  | 159.8(4)  |
| F(1)-C(2)-C(3)-Cl(1)    | -1.4(6)   | C(23)-C(18)-C(19)-C(20) | -0.9(7)   |
| C(2)-C(3)-C(4)-F(2)     | -180.0(4) | P(1)-C(18)-C(19)-C(20)  | 177.9(4)  |
| Cl(1)-C(3)-C(4)-F(2)    | -0.2(7)   | C(18)-C(19)-C(20)-C(21) | 1.8(8)    |
| C(2)-C(3)-C(4)-C(5)     | 1.0(7)    | C(19)-C(20)-C(21)-C(22) | -1.6(8)   |
| Cl(1)-C(3)-C(4)-C(5)    | -179.2(4) | C(20)-C(21)-C(22)-C(23) | 0.5(7)    |
| F(2)-C(4)-C(5)-C(6)     | -179.7(4) | C(21)-C(22)-C(23)-C(18) | 0.3(7)    |
| C(3)-C(4)-C(5)-C(6)     | -0.6(7)   | C(19)-C(18)-C(23)-C(22) | -0.1(7)   |
| F(2)-C(4)-C(5)-Cl(2)    | -1.1(6)   | P(1)-C(18)-C(23)-C(22)  | -179.0(3) |
| C(3)-C(4)-C(5)-Cl(2)    | 178.0(4)  | C(29)-C(24)-C(25)-F(4)  | 177.9(4)  |
| C(4)-C(5)-C(6)-F(3)     | 180.0(4)  | Au(2)-C(24)-C(25)-F(4)  | -3.2(6)   |
| Cl(2)-C(5)-C(6)-F(3)    | 1.4(6)    | C(29)-C(24)-C(25)-C(26) | -3.1(6)   |
| C(4)-C(5)-C(6)-C(1)     | 1.4(7)    | Au(2)-C(24)-C(25)-C(26) | 175.9(3)  |
| Cl(2)-C(5)-C(6)-C(1)    | -177.2(4) | F(4)-C(25)-C(26)-C(27)  | 179.2(4)  |
| C(2)-C(1)-C(6)-F(3)     | 179.1(4)  | C(24)-C(25)-C(26)-C(27) | 0.1(7)    |
| Au(1)-C(1)-C(6)-F(3)    | 7.1(6)    | F(4)-C(25)-C(26)-Cl(3)  | -1.5(6)   |
| C(2)-C(1)-C(6)-C(5)     | -2.3(7)   | C(24)-C(25)-C(26)-Cl(3) | 179.5(3)  |
| Au(1)-C(1)-C(6)-C(5)    | -174.3(4) | C(25)-C(26)-C(27)-F(5)  | -178.4(4) |
| C(11)-N(1)-C(7)-C(8)    | 2.1(6)    | Cl(3)-C(26)-C(27)-F(5)  | 2.3(6)    |
| Cu(1)-N(1)-C(7)-C(8)    | -174.6(3) | C(25)-C(26)-C(27)-C(28) | 2.4(7)    |
| C(11)-N(1)-C(7)-P(1)    | -173.6(3) | Cl(3)-C(26)-C(27)-C(28) | -176.9(4) |
| Cu(1)-N(1)-C(7)-P(1)    | 9.7(4)    | F(5)-C(27)-C(28)-C(29)  | 179.1(4)  |
| C(18)-P(1)-C(7)-N(1)    | -169.7(3) | C(26)-C(27)-C(28)-C(29) | -1.7(7)   |
| C(12)-P(1)-C(7)-N(1)    | 75.7(3)   | F(5)-C(27)-C(28)-Cl(4)  | -0.3(6)   |
| Au(1)-P(1)-C(7)-N(1)    | -44.6(3)  | C(26)-C(27)-C(28)-Cl(4) | 178.9(4)  |
| C(18)-P(1)-C(7)-C(8)    | 14.6(4)   | C(27)-C(28)-C(29)-F(6)  | 178.4(4)  |
| C(12)-P(1)-C(7)-C(8)    | -100.0(4) | Cl(4)-C(28)-C(29)-F(6)  | -2.2(6)   |
| Au(1)-P(1)-C(7)-C(8)    | 139.7(3)  | C(27)-C(28)-C(29)-C(24) | -1.7(7)   |
| N(1)-C(7)-C(8)-C(9)     | -2.0(7)   | Cl(4)-C(28)-C(29)-C(24) | 177.7(3)  |
| P(1)-C(7)-C(8)-C(9)     | 173.3(3)  | C(25)-C(24)-C(29)-F(6)  | -176.1(4) |
| C(7)-C(8)-C(9)-C(10)    | 0.7(7)    | Au(2)-C(24)-C(29)-F(6)  | 4.8(5)    |
| C(8)-C(9)-C(10)-C(11)   | 0.5(7)    | C(25)-C(24)-C(29)-C(28) | 3.9(6)    |
| C(7)-N(1)-C(11)-C(10)   | -0.8(6)   | Au(2)-C(24)-C(29)-C(28) | -175.1(3) |
| Cu(1)-N(1)-C(11)-C(10)  | 175.8(4)  | C(34)-N(2)-C(30)-C(31)  | 3.0(6)    |
| C(9)-C(10)-C(11)-N(1)   | -0.4(7)   | Cu(1)-N(2)-C(30)-C(31)  | -172.0(3) |
| C(18)-P(1)-C(12)-C(13)  | 117.3(4)  | C(34)-N(2)-C(30)-P(2)   | -174.1(3) |
| C(7)-P(1)-C(12)-C(13)   | -132.3(4) | Cu(1)-N(2)-C(30)-P(2)   | 10.9(5)   |
| Au(1)-P(1)-C(12)-C(13)  | -7.5(4)   | C(41)-P(2)-C(30)-N(2)   | -163.9(3) |
| C(18)-P(1)-C(12)-C(17)  | -66.3(4)  | C(35)-P(2)-C(30)-N(2)   | 86.1(3)   |
| C(7)-P(1)-C(12)-C(17)   | 44.1(4)   | Au(2)-P(2)-C(30)-N(2)   | -35.3(4)  |
| Au(1)-P(1)-C(12)-C(17)  | 169.0(3)  | C(41)-P(2)-C(30)-C(31)  | 19.0(4)   |
| C(17)-C(12)-C(13)-C(14) | -1.2(7)   | C(35)-P(2)-C(30)-C(31)  | -91.0(4)  |
| P(1)-C(12)-C(13)-C(14)  | 175.3(4)  | Au(2)-P(2)-C(30)-C(31)  | 147.6(3)  |
| C(12)-C(13)-C(14)-C(15) | 1.7(7)    | N(2)-C(30)-C(31)-C(32)  | -2.1(7)   |
| C(13)-C(14)-C(15)-C(16) | -1.0(7)   | P(2)-C(30)-C(31)-C(32)  | 174.8(4)  |
| C(14)-C(15)-C(16)-C(17) | -0.1(7)   | C(30)-C(31)-C(32)-C(33) | 0.0(7)    |
| C(15)-C(16)-C(17)-C(12) | 0.6(7)    | C(31)-C(32)-C(33)-C(34) | 1.0(8)    |
| C(13)-C(12)-C(17)-C(16) | 0.0(6)    | C(30)-N(2)-C(34)-C(33)  | -2.0(7)   |

|                         |           |                         |           |
|-------------------------|-----------|-------------------------|-----------|
| Cu(1)-N(2)-C(34)-C(33)  | 173.4(4)  | P(2)-C(35)-C(40)-C(39)  | -172.8(3) |
| C(32)-C(33)-C(34)-N(2)  | 0.0(8)    | C(35)-P(2)-C(41)-C(42)  | 42.7(4)   |
| C(41)-P(2)-C(35)-C(40)  | 100.1(3)  | C(30)-P(2)-C(41)-C(42)  | -67.0(4)  |
| C(30)-P(2)-C(35)-C(40)  | -147.9(3) | Au(2)-P(2)-C(41)-C(42)  | 163.6(3)  |
| Au(2)-P(2)-C(35)-C(40)  | -23.1(3)  | C(35)-P(2)-C(41)-C(46)  | -132.2(3) |
| C(41)-P(2)-C(35)-C(36)  | -73.9(4)  | C(30)-P(2)-C(41)-C(46)  | 118.0(4)  |
| C(30)-P(2)-C(35)-C(36)  | 38.0(4)   | Au(2)-P(2)-C(41)-C(46)  | -11.4(4)  |
| Au(2)-P(2)-C(35)-C(36)  | 162.8(3)  | C(46)-C(41)-C(42)-C(43) | -0.8(6)   |
| C(40)-C(35)-C(36)-C(37) | -1.7(6)   | P(2)-C(41)-C(42)-C(43)  | -175.7(3) |
| P(2)-C(35)-C(36)-C(37)  | 172.2(3)  | C(41)-C(42)-C(43)-C(44) | 0.2(7)    |
| C(35)-C(36)-C(37)-C(38) | 0.2(6)    | C(42)-C(43)-C(44)-C(45) | 0.3(8)    |
| C(36)-C(37)-C(38)-C(39) | 1.7(6)    | C(43)-C(44)-C(45)-C(46) | -0.2(8)   |
| C(37)-C(38)-C(39)-C(40) | -2.0(6)   | C(44)-C(45)-C(46)-C(41) | -0.4(8)   |
| C(38)-C(39)-C(40)-C(35) | 0.4(6)    | C(42)-C(41)-C(46)-C(45) | 0.9(7)    |
| C(36)-C(35)-C(40)-C(39) | 1.4(6)    | P(2)-C(41)-C(46)-C(45)  | 176.0(4)  |

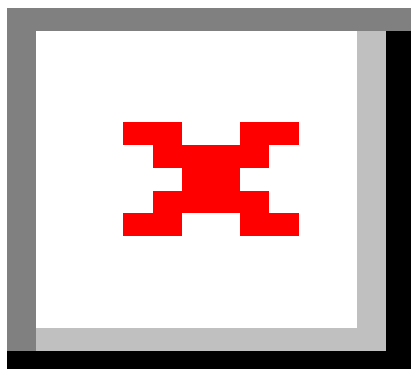

**Figure S4.** Thermal ellipsoid plot (50%) of  $[\text{Au}_2\text{Cu}(\text{C}_6\text{Cl}_2\text{F}_3)_2\{(\text{PPh}_2)_2\text{phen}\}](\text{BF}_4)$ , **4**.

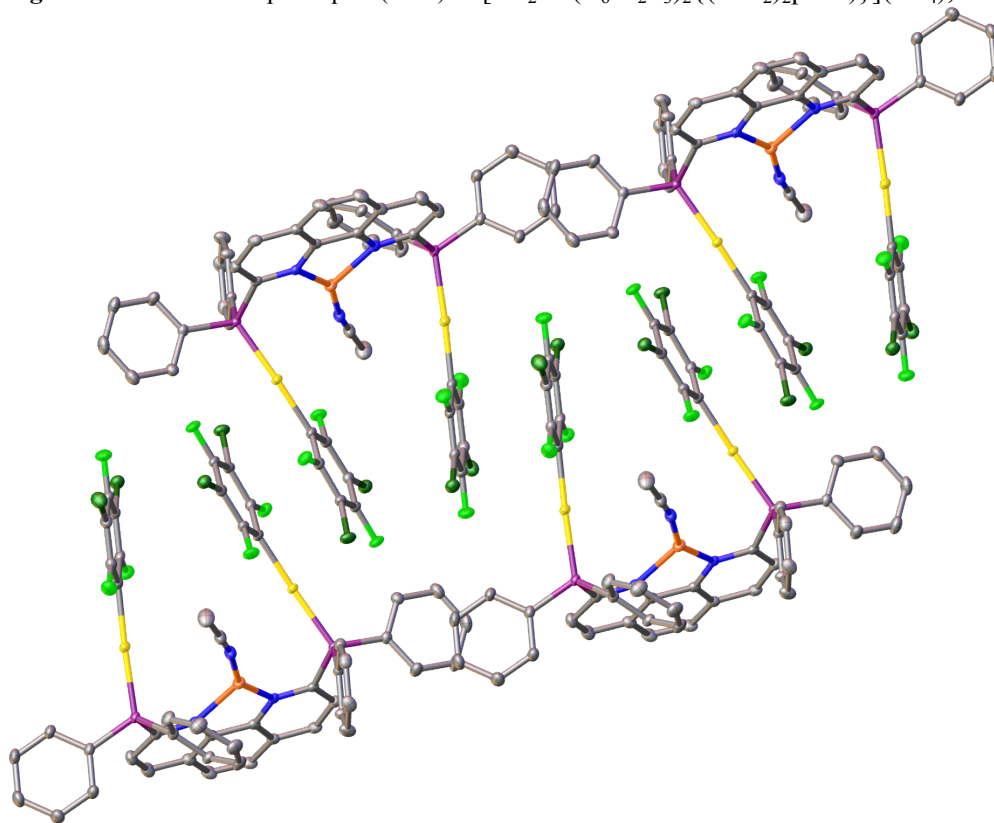

**Figure S5.** Thermal ellipsoid plot (50%) of  $[\text{Au}_2\text{Cu}(\text{C}_6\text{Cl}_2\text{F}_3)_2\{(\text{PPh}_2)_2\text{phen}\}](\text{BF}_4)$ , **4** showing extended lattice packing. Hydrogen atoms omitted (yellow = gold, orange = copper, fuchsia = phosphorus, light green = fluorine, dark green = chlorine, blue = nitrogen, gray = carbon).

Table S10. Crystallographic information for  $[\text{Au}_2\text{Cu}(\text{C}_6\text{Cl}_2\text{F}_3)_2\{(\text{PPh}_2)_2\text{phen}\}](\text{BF}_4) \cdot 0.5\text{CH}_2\text{Cl}_2, 4 \cdot \text{CH}_2\text{Cl}_2$ .

|                                   |                                                                                          |                                |
|-----------------------------------|------------------------------------------------------------------------------------------|--------------------------------|
| Identification code               | cat16_0m                                                                                 |                                |
| Empirical formula                 | $\text{C}_{50.5}\text{H}_{29}\text{Au}_2\text{BCl}_5\text{CuF}_{10}\text{N}_3\text{P}_2$ |                                |
| Formula weight                    | 1575.24                                                                                  |                                |
| Temperature                       | 100(2) K                                                                                 |                                |
| Wavelength                        | 0.71073 Å                                                                                |                                |
| Crystal system                    | Triclinic                                                                                |                                |
| Space group                       | P-1                                                                                      |                                |
| Unit cell dimensions              | a = 8.6930(3) Å                                                                          | $\alpha = 80.5590(10)^\circ$ . |
|                                   | b = 14.8328(5) Å                                                                         | $\beta = 86.5160(10)^\circ$ .  |
|                                   | c = 20.3022(6) Å                                                                         | $\gamma = 88.4640(10)^\circ$ . |
| Volume                            | 2577.19(15) Å <sup>3</sup>                                                               |                                |
| Z                                 | 2                                                                                        |                                |
| Density (calculated)              | 2.030 Mg/m <sup>3</sup>                                                                  |                                |
| Absorption coefficient            | 6.485 mm <sup>-1</sup>                                                                   |                                |
| F(000)                            | 1500                                                                                     |                                |
| Crystal size                      | 0.300 x 0.200 x 0.090 mm <sup>3</sup>                                                    |                                |
| Theta range for data collection   | 1.392 to 30.508°.                                                                        |                                |
| Index ranges                      | -12 ≤ h ≤ 12, -21 ≤ k ≤ 21, -28 ≤ l ≤ 28                                                 |                                |
| Reflections collected             | 65604                                                                                    |                                |
| Independent reflections           | 15695 [R(int) = 0.0214]                                                                  |                                |
| Completeness to theta = 25.242°   | 99.9 %                                                                                   |                                |
| Absorption correction             | Semi-empirical from equivalents                                                          |                                |
| Refinement method                 | Full-matrix least-squares on F <sup>2</sup>                                              |                                |
| Data / restraints / parameters    | 15695 / 0 / 687                                                                          |                                |
| Goodness-of-fit on F <sup>2</sup> | 1.028                                                                                    |                                |
| Final R indices [I > 2σ(I)]       | R1 = 0.0159, wR2 = 0.0362                                                                |                                |
| R indices (all data)              | R1 = 0.0190, wR2 = 0.0369                                                                |                                |
| Extinction coefficient            | 0.00002(3)                                                                               |                                |
| Largest diff. peak and hole       | 0.699 and -0.809 e.Å <sup>-3</sup>                                                       |                                |

Table S11. Bond distances (Å) and angles (°) for [Au<sub>2</sub>Cu(C<sub>6</sub>Cl<sub>2</sub>F<sub>3</sub>)<sub>2</sub>{(PPh<sub>2</sub>)<sub>2</sub>phen}](BF<sub>4</sub>) • 0.5CH<sub>2</sub>Cl<sub>2</sub>, **4**•CH<sub>2</sub>Cl<sub>2</sub>.

|              |            |              |          |
|--------------|------------|--------------|----------|
| Au(1)-C(1)   | 2.0528(17) | C(17)-H(17A) | 0.9500   |
| Au(1)-P(1)   | 2.2772(4)  | C(18)-H(18A) | 0.9500   |
| Au(2)-C(19)  | 2.0551(16) | C(19)-C(24)  | 1.385(2) |
| Au(2)-P(2)   | 2.2835(4)  | C(19)-C(20)  | 1.386(2) |
| Cu(1)-N(3)   | 1.8586(15) | C(20)-C(21)  | 1.392(2) |
| Cu(1)-N(2)   | 1.9823(13) | C(21)-C(22)  | 1.388(2) |
| Cu(1)-N(1)   | 2.1330(14) | C(22)-C(23)  | 1.388(2) |
| P(1)-C(25)   | 1.8108(18) | C(23)-C(24)  | 1.394(2) |
| P(1)-C(31)   | 1.8176(17) | C(25)-C(26)  | 1.396(2) |
| P(1)-C(7)    | 1.8369(17) | C(25)-C(30)  | 1.399(2) |
| P(2)-C(43)   | 1.8090(16) | C(26)-C(27)  | 1.392(3) |
| P(2)-C(37)   | 1.8123(17) | C(26)-H(26A) | 0.9500   |
| P(2)-C(16)   | 1.8405(16) | C(27)-C(28)  | 1.387(3) |
| N(1)-C(7)    | 1.337(2)   | C(27)-H(27A) | 0.9500   |
| N(1)-C(11)   | 1.358(2)   | C(28)-C(29)  | 1.391(3) |
| N(2)-C(16)   | 1.337(2)   | C(28)-H(28A) | 0.9500   |
| N(2)-C(12)   | 1.361(2)   | C(29)-C(30)  | 1.387(3) |
| N(3)-C(49)   | 1.140(2)   | C(29)-H(29A) | 0.9500   |
| Cl(1)-C(3)   | 1.7229(17) | C(30)-H(30A) | 0.9500   |
| Cl(2)-C(5)   | 1.7241(17) | C(31)-C(36)  | 1.394(2) |
| Cl(3)-C(21)  | 1.7221(17) | C(31)-C(32)  | 1.401(2) |
| Cl(4)-C(23)  | 1.7228(17) | C(32)-C(33)  | 1.391(3) |
| F(1)-C(2)    | 1.354(2)   | C(32)-H(32A) | 0.9500   |
| F(2)-C(4)    | 1.3400(19) | C(33)-C(34)  | 1.386(3) |
| F(3)-C(6)    | 1.3598(19) | C(33)-H(33A) | 0.9500   |
| F(4)-C(20)   | 1.3547(19) | C(34)-C(35)  | 1.387(3) |
| F(5)-C(22)   | 1.3390(18) | C(34)-H(34A) | 0.9500   |
| F(6)-C(24)   | 1.3540(19) | C(35)-C(36)  | 1.394(2) |
| B(1)-F(8)    | 1.381(2)   | C(35)-H(35A) | 0.9500   |
| B(1)-F(7)    | 1.383(2)   | C(36)-H(36A) | 0.9500   |
| B(1)-F(10)   | 1.383(2)   | C(37)-C(38)  | 1.393(2) |
| B(1)-F(9)    | 1.388(2)   | C(37)-C(42)  | 1.398(2) |
| C(1)-C(6)    | 1.385(2)   | C(38)-C(39)  | 1.394(3) |
| C(1)-C(2)    | 1.389(2)   | C(38)-H(38A) | 0.9500   |
| C(2)-C(3)    | 1.390(2)   | C(39)-C(40)  | 1.382(3) |
| C(3)-C(4)    | 1.382(2)   | C(39)-H(39A) | 0.9500   |
| C(4)-C(5)    | 1.389(2)   | C(40)-C(41)  | 1.393(3) |
| C(5)-C(6)    | 1.388(2)   | C(40)-H(40A) | 0.9500   |
| C(7)-C(8)    | 1.409(2)   | C(41)-C(42)  | 1.385(3) |
| C(8)-C(9)    | 1.375(3)   | C(41)-H(41A) | 0.9500   |
| C(8)-H(8A)   | 0.9500     | C(42)-H(42A) | 0.9500   |
| C(9)-C(10)   | 1.403(3)   | C(43)-C(48)  | 1.395(2) |
| C(9)-H(9A)   | 0.9500     | C(43)-C(44)  | 1.400(2) |
| C(10)-C(11)  | 1.414(2)   | C(44)-C(45)  | 1.390(2) |
| C(10)-C(17)  | 1.438(2)   | C(44)-H(44A) | 0.9500   |
| C(11)-C(12)  | 1.443(2)   | C(45)-C(46)  | 1.388(3) |
| C(12)-C(13)  | 1.409(2)   | C(45)-H(45A) | 0.9500   |
| C(13)-C(14)  | 1.402(2)   | C(46)-C(47)  | 1.387(3) |
| C(13)-C(18)  | 1.437(2)   | C(46)-H(46A) | 0.9500   |
| C(14)-C(15)  | 1.380(2)   | C(47)-C(48)  | 1.393(2) |
| C(14)-H(14A) | 0.9500     | C(47)-H(47A) | 0.9500   |
| C(15)-C(16)  | 1.403(2)   | C(48)-H(48A) | 0.9500   |
| C(15)-H(15A) | 0.9500     | C(49)-C(50)  | 1.457(3) |
| C(17)-C(18)  | 1.354(3)   | C(50)-H(50A) | 0.9800   |

|                  |            |                    |            |
|------------------|------------|--------------------|------------|
| C(50)-H(50B)     | 0.9800     | C(1)-C(6)-C(5)     | 124.71(16) |
| C(50)-H(50C)     | 0.9800     | N(1)-C(7)-C(8)     | 122.20(16) |
| C(1S)-Cl(1S)     | 1.316(6)   | N(1)-C(7)-P(1)     | 117.19(12) |
| C(1S)-C(1S)#1    | 1.510(11)  | C(8)-C(7)-P(1)     | 120.59(13) |
| C(1S)-Cl(2S)     | 1.756(5)   | C(9)-C(8)-C(7)     | 119.48(17) |
| C(1S)-Cl(1S)#1   | 1.808(7)   | C(9)-C(8)-H(8A)    | 120.3      |
| Cl(1S)-Cl(2S)    | 0.622(3)   | C(7)-C(8)-H(8A)    | 120.3      |
| Cl(1S)-C(1S)#1   | 1.808(7)   | C(8)-C(9)-C(10)    | 119.67(16) |
|                  |            | C(8)-C(9)-H(9A)    | 120.2      |
| C(1)-Au(1)-P(1)  | 176.56(5)  | C(10)-C(9)-H(9A)   | 120.2      |
| C(19)-Au(2)-P(2) | 173.39(5)  | C(9)-C(10)-C(11)   | 117.22(16) |
| N(3)-Cu(1)-N(2)  | 151.12(6)  | C(9)-C(10)-C(17)   | 123.02(16) |
| N(3)-Cu(1)-N(1)  | 126.54(6)  | C(11)-C(10)-C(17)  | 119.75(16) |
| N(2)-Cu(1)-N(1)  | 82.27(6)   | N(1)-C(11)-C(10)   | 123.05(16) |
| C(25)-P(1)-C(31) | 107.17(8)  | N(1)-C(11)-C(12)   | 117.78(14) |
| C(25)-P(1)-C(7)  | 103.71(8)  | C(10)-C(11)-C(12)  | 119.17(15) |
| C(31)-P(1)-C(7)  | 105.24(8)  | N(2)-C(12)-C(13)   | 122.71(15) |
| C(25)-P(1)-Au(1) | 116.33(6)  | N(2)-C(12)-C(11)   | 117.67(14) |
| C(31)-P(1)-Au(1) | 112.05(6)  | C(13)-C(12)-C(11)  | 119.57(15) |
| C(7)-P(1)-Au(1)  | 111.47(6)  | C(14)-C(13)-C(12)  | 117.41(15) |
| C(43)-P(2)-C(37) | 105.89(7)  | C(14)-C(13)-C(18)  | 122.79(15) |
| C(43)-P(2)-C(16) | 105.63(7)  | C(12)-C(13)-C(18)  | 119.76(16) |
| C(37)-P(2)-C(16) | 104.91(8)  | C(15)-C(14)-C(13)  | 119.72(15) |
| C(43)-P(2)-Au(2) | 111.20(5)  | C(15)-C(14)-H(14A) | 120.1      |
| C(37)-P(2)-Au(2) | 115.34(6)  | C(13)-C(14)-H(14A) | 120.1      |
| C(16)-P(2)-Au(2) | 113.11(5)  | C(14)-C(15)-C(16)  | 119.31(16) |
| C(7)-N(1)-C(11)  | 118.26(14) | C(14)-C(15)-H(15A) | 120.3      |
| C(7)-N(1)-Cu(1)  | 133.10(12) | C(16)-C(15)-H(15A) | 120.3      |
| C(11)-N(1)-Cu(1) | 108.62(11) | N(2)-C(16)-C(15)   | 122.19(15) |
| C(16)-N(2)-C(12) | 118.56(14) | N(2)-C(16)-P(2)    | 114.68(11) |
| C(16)-N(2)-Cu(1) | 128.01(11) | C(15)-C(16)-P(2)   | 122.82(13) |
| C(12)-N(2)-Cu(1) | 113.44(11) | C(18)-C(17)-C(10)  | 120.82(16) |
| C(49)-N(3)-Cu(1) | 170.84(15) | C(18)-C(17)-H(17A) | 119.6      |
| F(8)-B(1)-F(7)   | 109.56(17) | C(10)-C(17)-H(17A) | 119.6      |
| F(8)-B(1)-F(10)  | 110.12(17) | C(17)-C(18)-C(13)  | 120.85(16) |
| F(7)-B(1)-F(10)  | 106.95(17) | C(17)-C(18)-H(18A) | 119.6      |
| F(8)-B(1)-F(9)   | 109.55(16) | C(13)-C(18)-H(18A) | 119.6      |
| F(7)-B(1)-F(9)   | 110.16(17) | C(24)-C(19)-C(20)  | 114.17(15) |
| F(10)-B(1)-F(9)  | 110.47(16) | C(24)-C(19)-Au(2)  | 125.65(13) |
| C(6)-C(1)-C(2)   | 114.23(15) | C(20)-C(19)-Au(2)  | 120.00(12) |
| C(6)-C(1)-Au(1)  | 124.57(13) | F(4)-C(20)-C(19)   | 118.79(15) |
| C(2)-C(1)-Au(1)  | 121.20(13) | F(4)-C(20)-C(21)   | 116.34(15) |
| F(1)-C(2)-C(1)   | 118.91(16) | C(19)-C(20)-C(21)  | 124.86(16) |
| F(1)-C(2)-C(3)   | 116.57(15) | C(22)-C(21)-C(20)  | 117.66(15) |
| C(1)-C(2)-C(3)   | 124.51(16) | C(22)-C(21)-Cl(3)  | 120.97(13) |
| C(4)-C(3)-C(2)   | 117.83(15) | C(20)-C(21)-Cl(3)  | 121.35(13) |
| C(4)-C(3)-Cl(1)  | 120.72(13) | F(5)-C(22)-C(23)   | 119.71(15) |
| C(2)-C(3)-Cl(1)  | 121.44(14) | F(5)-C(22)-C(21)   | 119.44(15) |
| F(2)-C(4)-C(3)   | 119.45(15) | C(23)-C(22)-C(21)  | 120.84(15) |
| F(2)-C(4)-C(5)   | 119.45(15) | C(22)-C(23)-C(24)  | 117.91(15) |
| C(3)-C(4)-C(5)   | 121.09(16) | C(22)-C(23)-Cl(4)  | 119.99(13) |
| C(6)-C(5)-C(4)   | 117.63(15) | C(24)-C(23)-Cl(4)  | 122.10(13) |
| C(6)-C(5)-Cl(2)  | 121.56(13) | F(6)-C(24)-C(19)   | 118.98(15) |
| C(4)-C(5)-Cl(2)  | 120.81(13) | F(6)-C(24)-C(23)   | 116.49(15) |
| F(3)-C(6)-C(1)   | 118.76(15) | C(19)-C(24)-C(23)  | 124.53(16) |
| F(3)-C(6)-C(5)   | 116.53(15) | C(26)-C(25)-C(30)  | 120.13(16) |

|                    |            |                     |            |
|--------------------|------------|---------------------|------------|
| C(26)-C(25)-P(1)   | 118.88(14) | C(37)-C(38)-H(38A)  | 119.9      |
| C(30)-C(25)-P(1)   | 120.88(13) | C(39)-C(38)-H(38A)  | 119.9      |
| C(27)-C(26)-C(25)  | 119.76(17) | C(40)-C(39)-C(38)   | 119.84(18) |
| C(27)-C(26)-H(26A) | 120.1      | C(40)-C(39)-H(39A)  | 120.1      |
| C(25)-C(26)-H(26A) | 120.1      | C(38)-C(39)-H(39A)  | 120.1      |
| C(28)-C(27)-C(26)  | 119.92(17) | C(39)-C(40)-C(41)   | 120.39(18) |
| C(28)-C(27)-H(27A) | 120.0      | C(39)-C(40)-H(40A)  | 119.8      |
| C(26)-C(27)-H(27A) | 120.0      | C(41)-C(40)-H(40A)  | 119.8      |
| C(27)-C(28)-C(29)  | 120.39(18) | C(42)-C(41)-C(40)   | 119.85(18) |
| C(27)-C(28)-H(28A) | 119.8      | C(42)-C(41)-H(41A)  | 120.1      |
| C(29)-C(28)-H(28A) | 119.8      | C(40)-C(41)-H(41A)  | 120.1      |
| C(30)-C(29)-C(28)  | 120.14(18) | C(41)-C(42)-C(37)   | 120.17(18) |
| C(30)-C(29)-H(29A) | 119.9      | C(41)-C(42)-H(42A)  | 119.9      |
| C(28)-C(29)-H(29A) | 119.9      | C(37)-C(42)-H(42A)  | 119.9      |
| C(29)-C(30)-C(25)  | 119.64(17) | C(48)-C(43)-C(44)   | 120.24(15) |
| C(29)-C(30)-H(30A) | 120.2      | C(48)-C(43)-P(2)    | 122.83(12) |
| C(25)-C(30)-H(30A) | 120.2      | C(44)-C(43)-P(2)    | 116.87(12) |
| C(36)-C(31)-C(32)  | 119.64(16) | C(45)-C(44)-C(43)   | 119.94(16) |
| C(36)-C(31)-P(1)   | 123.49(13) | C(45)-C(44)-H(44A)  | 120.0      |
| C(32)-C(31)-P(1)   | 116.61(13) | C(43)-C(44)-H(44A)  | 120.0      |
| C(33)-C(32)-C(31)  | 119.94(17) | C(46)-C(45)-C(44)   | 119.61(16) |
| C(33)-C(32)-H(32A) | 120.0      | C(46)-C(45)-H(45A)  | 120.2      |
| C(31)-C(32)-H(32A) | 120.0      | C(44)-C(45)-H(45A)  | 120.2      |
| C(34)-C(33)-C(32)  | 120.00(17) | C(47)-C(46)-C(45)   | 120.66(16) |
| C(34)-C(33)-H(33A) | 120.0      | C(47)-C(46)-H(46A)  | 119.7      |
| C(32)-C(33)-H(33A) | 120.0      | C(45)-C(46)-H(46A)  | 119.7      |
| C(33)-C(34)-C(35)  | 120.26(18) | C(46)-C(47)-C(48)   | 120.23(17) |
| C(33)-C(34)-H(34A) | 119.9      | C(46)-C(47)-H(47A)  | 119.9      |
| C(35)-C(34)-H(34A) | 119.9      | C(48)-C(47)-H(47A)  | 119.9      |
| C(34)-C(35)-C(36)  | 120.18(17) | C(47)-C(48)-C(43)   | 119.32(16) |
| C(34)-C(35)-H(35A) | 119.9      | C(47)-C(48)-H(48A)  | 120.3      |
| C(36)-C(35)-H(35A) | 119.9      | C(43)-C(48)-H(48A)  | 120.3      |
| C(35)-C(36)-C(31)  | 119.79(16) | N(3)-C(49)-C(50)    | 178.1(2)   |
| C(35)-C(36)-H(36A) | 120.1      | C(49)-C(50)-H(50A)  | 109.5      |
| C(31)-C(36)-H(36A) | 120.1      | C(49)-C(50)-H(50B)  | 109.5      |
| C(38)-C(37)-C(42)  | 119.47(16) | H(50A)-C(50)-H(50B) | 109.5      |
| C(38)-C(37)-P(2)   | 118.86(13) | C(49)-C(50)-H(50C)  | 109.5      |
| C(42)-C(37)-P(2)   | 121.67(13) | H(50A)-C(50)-H(50C) | 109.5      |
| C(37)-C(38)-C(39)  | 120.20(17) | H(50B)-C(50)-H(50C) | 109.5      |

Table S12. Torsion angles (°) for [Au<sub>2</sub>Cu(C<sub>6</sub>Cl<sub>2</sub>F<sub>3</sub>)<sub>2</sub>{(PPh<sub>2</sub>)<sub>2</sub>phen}](BF<sub>4</sub>) • 0.5CH<sub>2</sub>Cl<sub>2</sub>, 4•CH<sub>2</sub>Cl<sub>2</sub>.

|                         |             |                         |             |
|-------------------------|-------------|-------------------------|-------------|
| C(6)-C(1)-C(2)-F(1)     | 179.62(15)  | C(10)-C(11)-C(12)-C(13) | 2.6(2)      |
| Au(1)-C(1)-C(2)-F(1)    | -0.4(2)     | N(2)-C(12)-C(13)-C(14)  | -3.4(2)     |
| C(6)-C(1)-C(2)-C(3)     | 0.0(3)      | C(11)-C(12)-C(13)-C(14) | 179.33(15)  |
| Au(1)-C(1)-C(2)-C(3)    | 179.92(13)  | N(2)-C(12)-C(13)-C(18)  | 174.24(15)  |
| F(1)-C(2)-C(3)-C(4)     | 180.00(15)  | C(11)-C(12)-C(13)-C(18) | -3.1(2)     |
| C(1)-C(2)-C(3)-C(4)     | -0.4(3)     | C(12)-C(13)-C(14)-C(15) | 2.9(2)      |
| F(1)-C(2)-C(3)-Cl(1)    | -1.5(2)     | C(18)-C(13)-C(14)-C(15) | -174.66(16) |
| C(1)-C(2)-C(3)-Cl(1)    | 178.20(14)  | C(13)-C(14)-C(15)-C(16) | -0.3(2)     |
| C(2)-C(3)-C(4)-F(2)     | 179.87(15)  | C(12)-N(2)-C(16)-C(15)  | 1.8(2)      |
| Cl(1)-C(3)-C(4)-F(2)    | 1.3(2)      | Cu(1)-N(2)-C(16)-C(15)  | -177.63(12) |
| C(2)-C(3)-C(4)-C(5)     | 0.7(3)      | C(12)-N(2)-C(16)-P(2)   | -171.95(11) |
| Cl(1)-C(3)-C(4)-C(5)    | -177.89(13) | Cu(1)-N(2)-C(16)-P(2)   | 8.63(18)    |
| F(2)-C(4)-C(5)-C(6)     | -179.80(15) | C(14)-C(15)-C(16)-N(2)  | -2.2(2)     |
| C(3)-C(4)-C(5)-C(6)     | -0.6(2)     | C(14)-C(15)-C(16)-P(2)  | 171.04(13)  |
| F(2)-C(4)-C(5)-Cl(2)    | 1.3(2)      | C(43)-P(2)-C(16)-N(2)   | -67.87(13)  |
| C(3)-C(4)-C(5)-Cl(2)    | -179.52(13) | C(37)-P(2)-C(16)-N(2)   | -179.50(12) |
| C(2)-C(1)-C(6)-F(3)     | 179.47(14)  | Au(2)-P(2)-C(16)-N(2)   | 53.97(13)   |
| Au(1)-C(1)-C(6)-F(3)    | -0.5(2)     | C(43)-P(2)-C(16)-C(15)  | 118.43(14)  |
| C(2)-C(1)-C(6)-C(5)     | 0.1(2)      | C(37)-P(2)-C(16)-C(15)  | 6.80(15)    |
| Au(1)-C(1)-C(6)-C(5)    | -179.85(13) | Au(2)-P(2)-C(16)-C(15)  | -119.72(13) |
| C(4)-C(5)-C(6)-F(3)     | -179.18(14) | C(9)-C(10)-C(17)-C(18)  | 177.25(18)  |
| Cl(2)-C(5)-C(6)-F(3)    | -0.3(2)     | C(11)-C(10)-C(17)-C(18) | -2.0(3)     |
| C(4)-C(5)-C(6)-C(1)     | 0.2(3)      | C(10)-C(17)-C(18)-C(13) | 1.5(3)      |
| Cl(2)-C(5)-C(6)-C(1)    | 179.12(14)  | C(14)-C(13)-C(18)-C(17) | 178.51(17)  |
| C(11)-N(1)-C(7)-C(8)    | 3.8(2)      | C(12)-C(13)-C(18)-C(17) | 1.0(3)      |
| Cu(1)-N(1)-C(7)-C(8)    | -173.87(13) | C(24)-C(19)-C(20)-F(4)  | 176.96(14)  |
| C(11)-N(1)-C(7)-P(1)    | -177.95(12) | Au(2)-C(19)-C(20)-F(4)  | 1.5(2)      |
| Cu(1)-N(1)-C(7)-P(1)    | 4.4(2)      | C(24)-C(19)-C(20)-C(21) | -2.0(2)     |
| C(25)-P(1)-C(7)-N(1)    | 166.13(13)  | Au(2)-C(19)-C(20)-C(21) | -177.42(13) |
| C(31)-P(1)-C(7)-N(1)    | 53.72(15)   | F(4)-C(20)-C(21)-C(22)  | -177.79(14) |
| Au(1)-P(1)-C(7)-N(1)    | -67.96(14)  | C(19)-C(20)-C(21)-C(22) | 1.2(3)      |
| C(25)-P(1)-C(7)-C(8)    | -15.61(16)  | F(4)-C(20)-C(21)-Cl(3)  | 0.6(2)      |
| C(31)-P(1)-C(7)-C(8)    | -128.02(15) | C(19)-C(20)-C(21)-Cl(3) | 179.57(14)  |
| Au(1)-P(1)-C(7)-C(8)    | 110.30(14)  | C(20)-C(21)-C(22)-F(5)  | 179.70(14)  |
| N(1)-C(7)-C(8)-C(9)     | -1.5(3)     | Cl(3)-C(21)-C(22)-F(5)  | 1.3(2)      |
| P(1)-C(7)-C(8)-C(9)     | -179.65(14) | C(20)-C(21)-C(22)-C(23) | 0.7(2)      |
| C(7)-C(8)-C(9)-C(10)    | -1.5(3)     | Cl(3)-C(21)-C(22)-C(23) | -177.65(13) |
| C(8)-C(9)-C(10)-C(11)   | 1.9(3)      | F(5)-C(22)-C(23)-C(24)  | 179.42(14)  |
| C(8)-C(9)-C(10)-C(17)   | -177.35(18) | C(21)-C(22)-C(23)-C(24) | -1.6(2)     |
| C(7)-N(1)-C(11)-C(10)   | -3.4(2)     | F(5)-C(22)-C(23)-Cl(4)  | -1.7(2)     |
| Cu(1)-N(1)-C(11)-C(10)  | 174.87(13)  | C(21)-C(22)-C(23)-Cl(4) | 177.28(13)  |
| C(7)-N(1)-C(11)-C(12)   | 176.53(15)  | C(20)-C(19)-C(24)-F(6)  | -178.21(14) |
| Cu(1)-N(1)-C(11)-C(12)  | -5.25(17)   | Au(2)-C(19)-C(24)-F(6)  | -3.1(2)     |
| C(9)-C(10)-C(11)-N(1)   | 0.5(3)      | C(20)-C(19)-C(24)-C(23) | 1.0(2)      |
| C(17)-C(10)-C(11)-N(1)  | 179.79(16)  | Au(2)-C(19)-C(24)-C(23) | 176.13(13)  |
| C(9)-C(10)-C(11)-C(12)  | -179.36(16) | C(22)-C(23)-C(24)-F(6)  | 179.95(14)  |
| C(17)-C(10)-C(11)-C(12) | -0.1(2)     | Cl(4)-C(23)-C(24)-F(6)  | 1.1(2)      |
| C(16)-N(2)-C(12)-C(13)  | 1.1(2)      | C(22)-C(23)-C(24)-C(19) | 0.7(3)      |
| Cu(1)-N(2)-C(12)-C(13)  | -179.45(12) | Cl(4)-C(23)-C(24)-C(19) | -178.16(14) |
| C(16)-N(2)-C(12)-C(11)  | 178.41(14)  | C(31)-P(1)-C(25)-C(26)  | -144.80(14) |
| Cu(1)-N(2)-C(12)-C(11)  | -2.10(18)   | C(7)-P(1)-C(25)-C(26)   | 104.19(15)  |
| N(1)-C(11)-C(12)-N(2)   | 5.2(2)      | Au(1)-P(1)-C(25)-C(26)  | -18.57(16)  |
| C(10)-C(11)-C(12)-N(2)  | -174.86(15) | C(31)-P(1)-C(25)-C(30)  | 39.04(17)   |
| N(1)-C(11)-C(12)-C(13)  | -177.32(15) | C(7)-P(1)-C(25)-C(30)   | -71.96(16)  |



|                         |             |
|-------------------------|-------------|
| Au(1)-P(1)-C(25)-C(30)  | 165.28(13)  |
| C(30)-C(25)-C(26)-C(27) | 0.6(3)      |
| P(1)-C(25)-C(26)-C(27)  | -175.63(15) |
| C(25)-C(26)-C(27)-C(28) | 0.2(3)      |
| C(26)-C(27)-C(28)-C(29) | -0.5(3)     |
| C(27)-C(28)-C(29)-C(30) | 0.0(3)      |
| C(28)-C(29)-C(30)-C(25) | 0.8(3)      |
| C(26)-C(25)-C(30)-C(29) | -1.0(3)     |
| P(1)-C(25)-C(30)-C(29)  | 175.06(15)  |
| C(25)-P(1)-C(31)-C(36)  | -105.48(16) |
| C(7)-P(1)-C(31)-C(36)   | 4.47(17)    |
| Au(1)-P(1)-C(31)-C(36)  | 125.77(14)  |
| C(25)-P(1)-C(31)-C(32)  | 80.37(15)   |
| C(7)-P(1)-C(31)-C(32)   | -169.68(14) |
| Au(1)-P(1)-C(31)-C(32)  | -48.38(15)  |
| C(36)-C(31)-C(32)-C(33) | -2.6(3)     |
| P(1)-C(31)-C(32)-C(33)  | 171.82(16)  |
| C(31)-C(32)-C(33)-C(34) | -1.4(3)     |
| C(32)-C(33)-C(34)-C(35) | 3.6(3)      |
| C(33)-C(34)-C(35)-C(36) | -1.8(3)     |
| C(34)-C(35)-C(36)-C(31) | -2.2(3)     |
| C(32)-C(31)-C(36)-C(35) | 4.3(3)      |
| P(1)-C(31)-C(36)-C(35)  | -169.63(14) |
| C(43)-P(2)-C(37)-C(38)  | 130.47(13)  |
| C(16)-P(2)-C(37)-C(38)  | -118.08(13) |
| Au(2)-P(2)-C(37)-C(38)  | 7.05(15)    |
| C(43)-P(2)-C(37)-C(42)  | -50.28(16)  |
| C(16)-P(2)-C(37)-C(42)  | 61.17(16)   |
| Au(2)-P(2)-C(37)-C(42)  | -173.69(12) |
| C(42)-C(37)-C(38)-C(39) | -1.4(3)     |
| P(2)-C(37)-C(38)-C(39)  | 177.91(14)  |
| C(37)-C(38)-C(39)-C(40) | -1.2(3)     |
| C(38)-C(39)-C(40)-C(41) | 2.1(3)      |
| C(39)-C(40)-C(41)-C(42) | -0.5(3)     |
| C(40)-C(41)-C(42)-C(37) | -2.1(3)     |
| C(38)-C(37)-C(42)-C(41) | 3.0(3)      |
| P(2)-C(37)-C(42)-C(41)  | -176.21(15) |
| C(37)-P(2)-C(43)-C(48)  | 87.20(15)   |
| C(16)-P(2)-C(43)-C(48)  | -23.75(16)  |
| Au(2)-P(2)-C(43)-C(48)  | -146.82(13) |
| C(37)-P(2)-C(43)-C(44)  | -90.05(14)  |
| C(16)-P(2)-C(43)-C(44)  | 159.01(13)  |
| Au(2)-P(2)-C(43)-C(44)  | 35.94(14)   |
| C(48)-C(43)-C(44)-C(45) | -0.1(3)     |
| P(2)-C(43)-C(44)-C(45)  | 177.23(13)  |
| C(43)-C(44)-C(45)-C(46) | 0.3(3)      |
| C(44)-C(45)-C(46)-C(47) | -0.3(3)     |
| C(45)-C(46)-C(47)-C(48) | 0.0(3)      |
| C(46)-C(47)-C(48)-C(43) | 0.3(3)      |
| C(44)-C(43)-C(48)-C(47) | -0.2(3)     |
| P(2)-C(43)-C(48)-C(47)  | -177.38(14) |

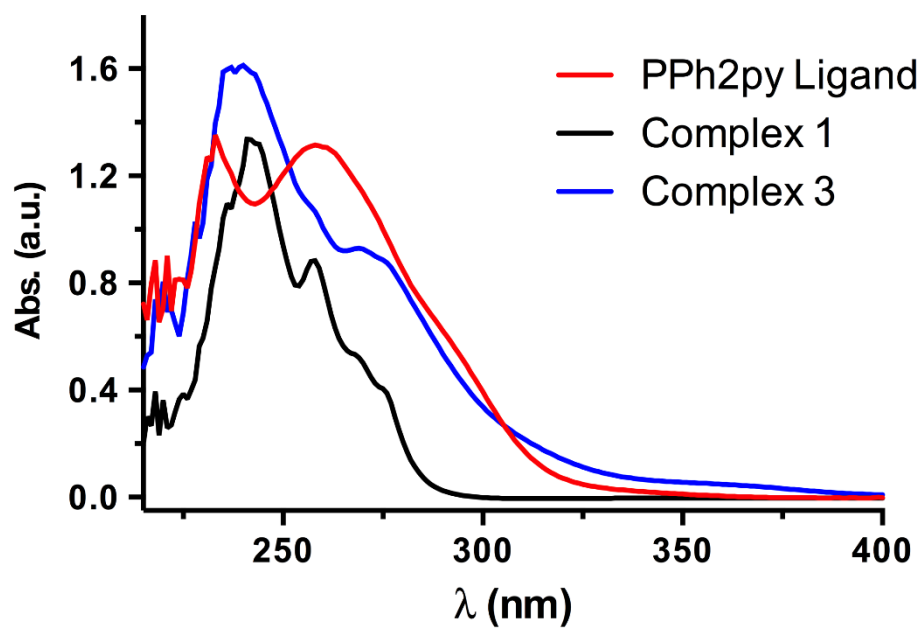

Figure S6. UV-Vis absorption spectra of PPh<sub>2</sub>py ligand and complexes 1 and 3 in dichloromethane.

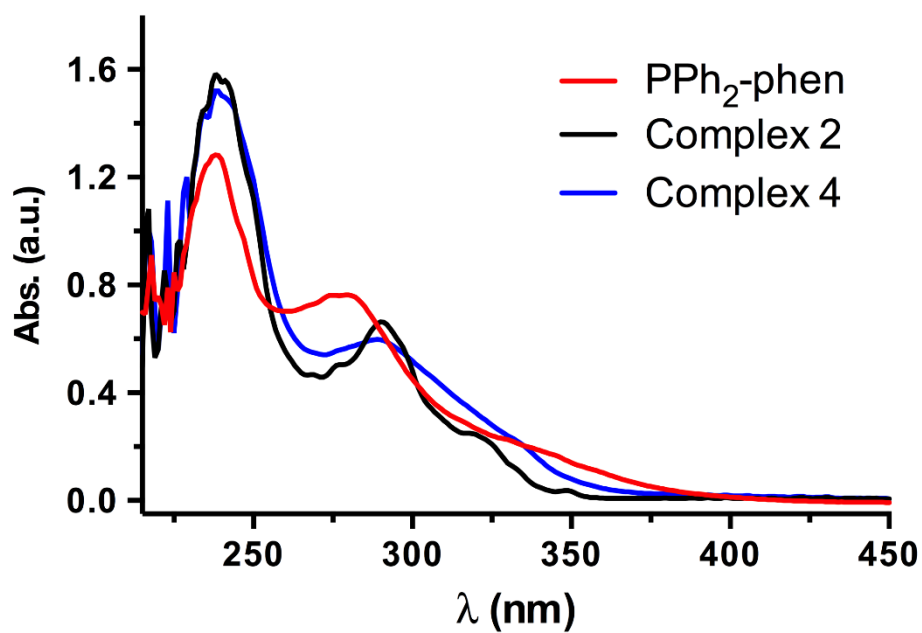

Figure S7. UV-Vis absorption spectra of PPh<sub>2</sub>-phen ligand and complexes 2 and 4 in tetrahydrofuran.

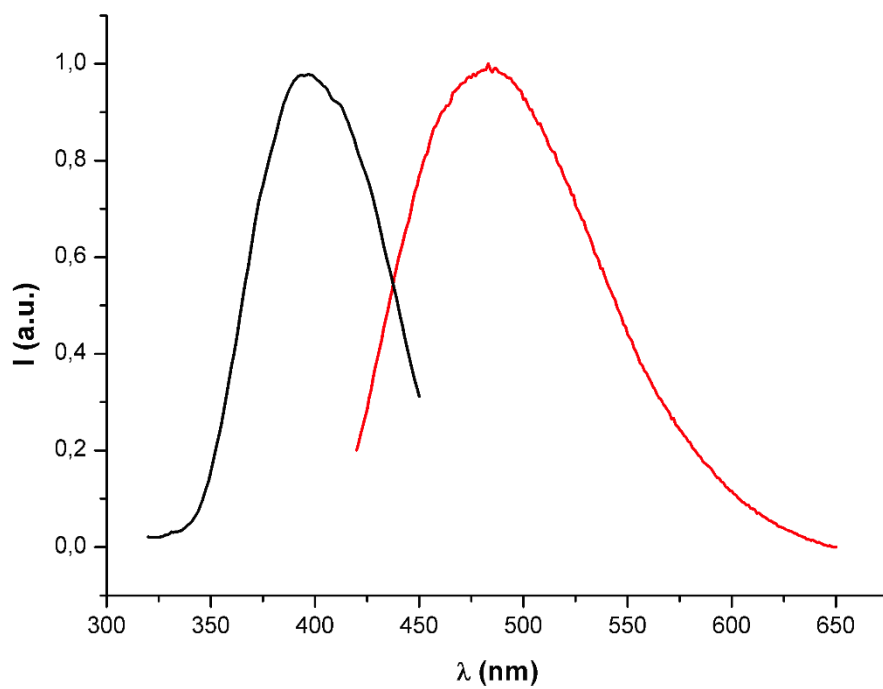

**Figure S8.**Excitation and emission spectra for PPh<sub>2</sub>py ligand in solid state at room temperature.

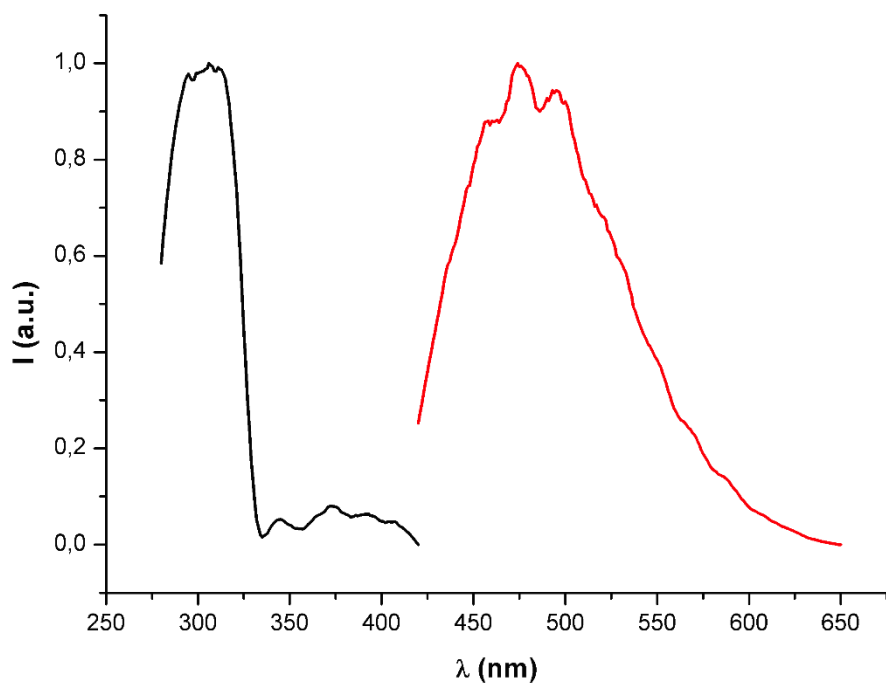

**Figure S9.**Excitation and emission spectra for PPh<sub>2</sub>py ligand in solid state at 77 K.

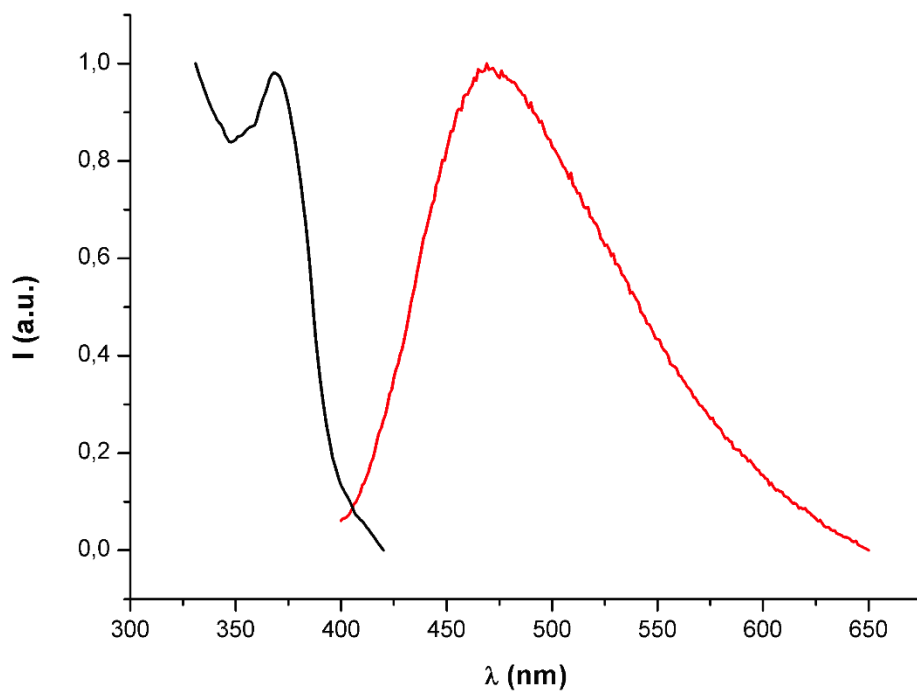

**Figure S10.**Excitation and emission spectra for PPh<sub>2</sub>phen ligand in solid state at room temperature.

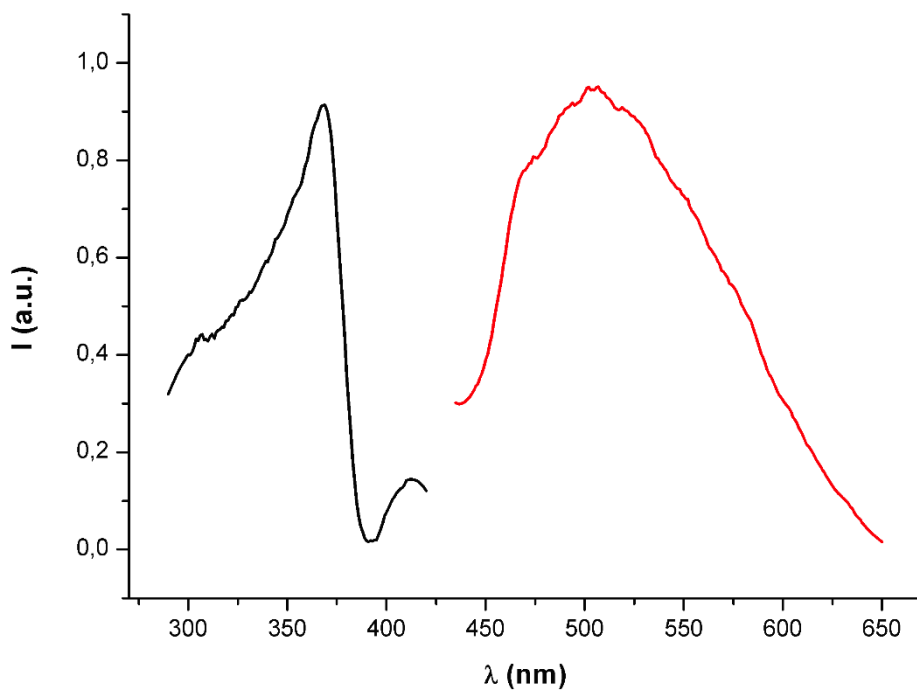

**Figure S11.**Excitation and emission spectra for PPh<sub>2</sub>phen ligand in solid state at 77 K.

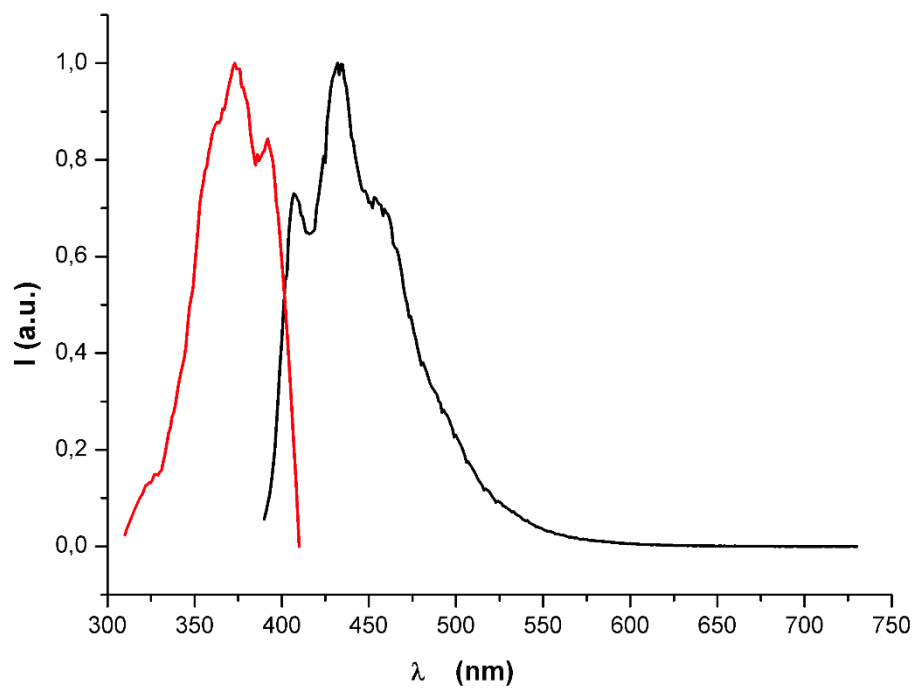

**Figure S12.** Excitation and emission spectra for  $\text{PPh}_2\text{-phen}$  ligand in tetrahydrofuran solutions.

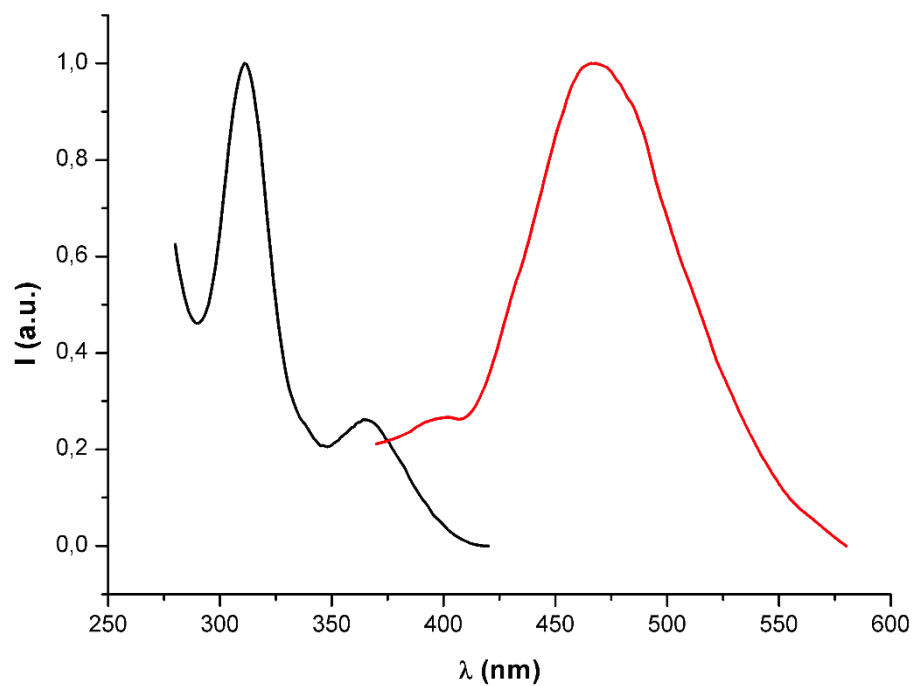

**Figure S13.** Excitation and emission spectra for complex **1** in solid state at room temperature.

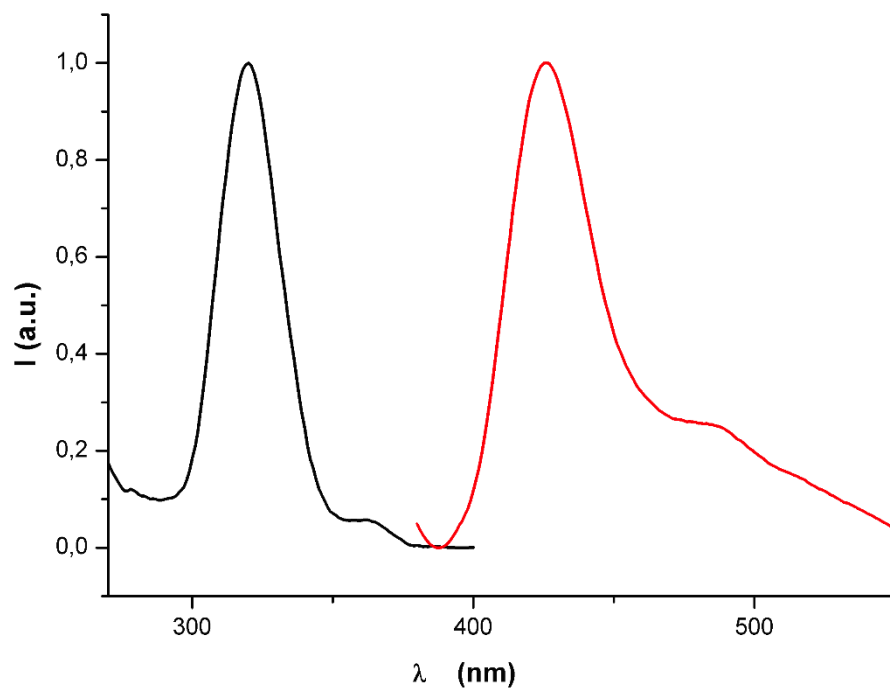

**Figure S14.** Excitation and emission spectra for complex **1** in solid state at 77 K.

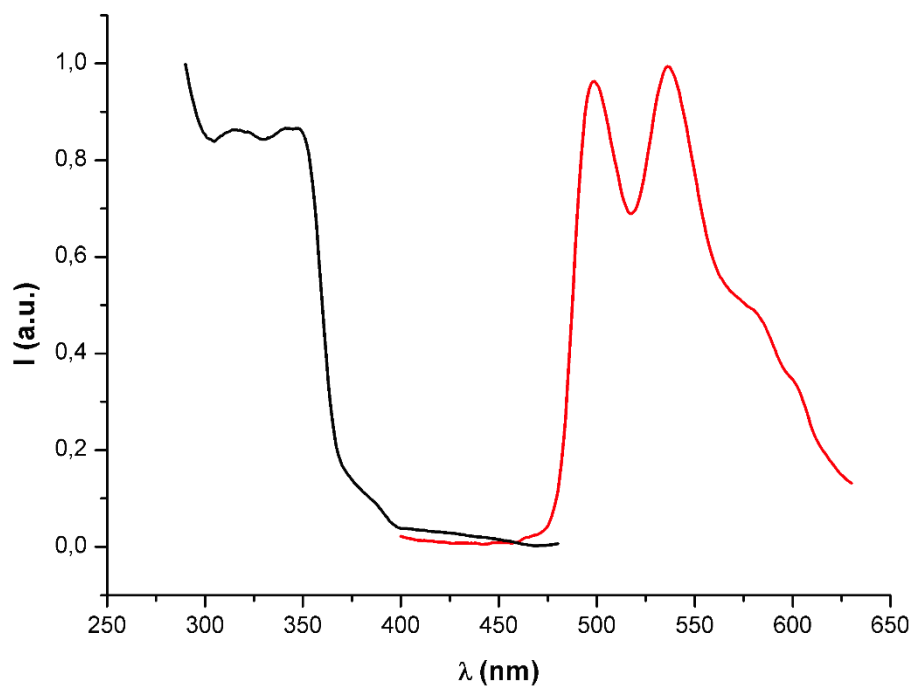

**Figure S15.** Excitation and emission spectra for complex **2** in solid state at room temperature.

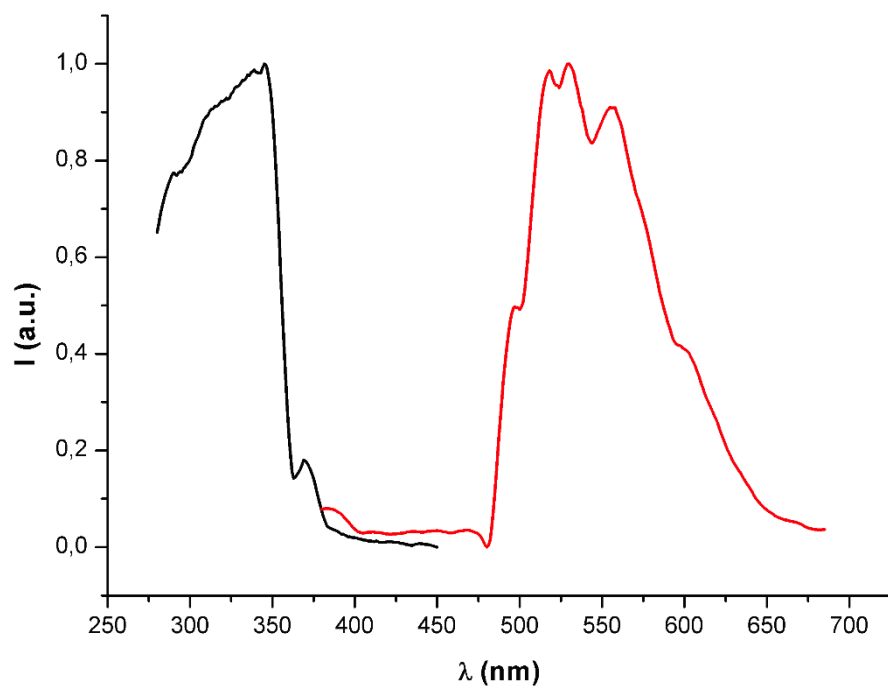

**Figure S16.** Excitation and emission spectra for complex **2** in solid state at 77 K.

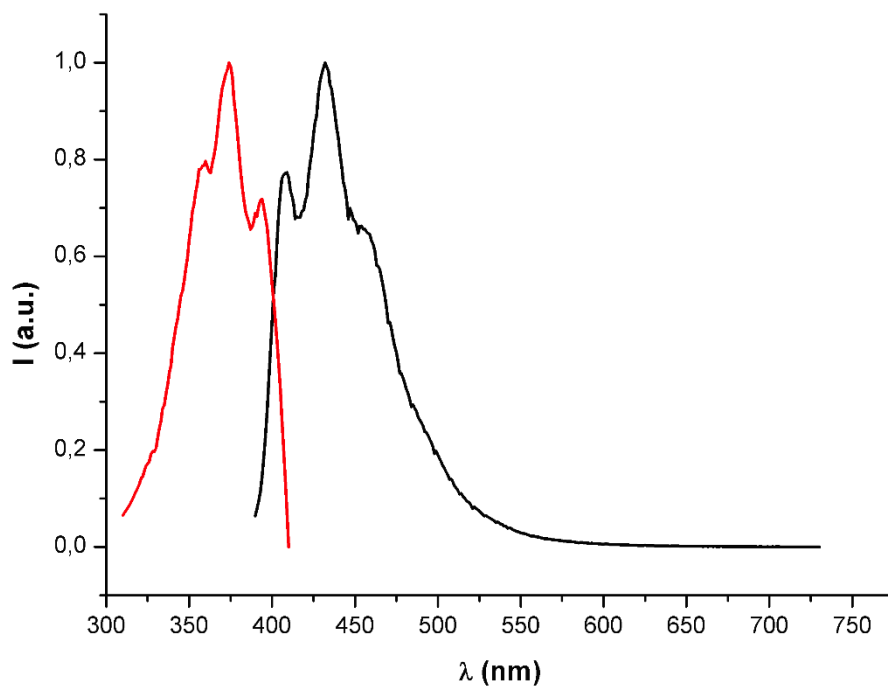

**Figure S17.** Excitation and emission spectra for complex **2** in tetrahydrofuran solutions.

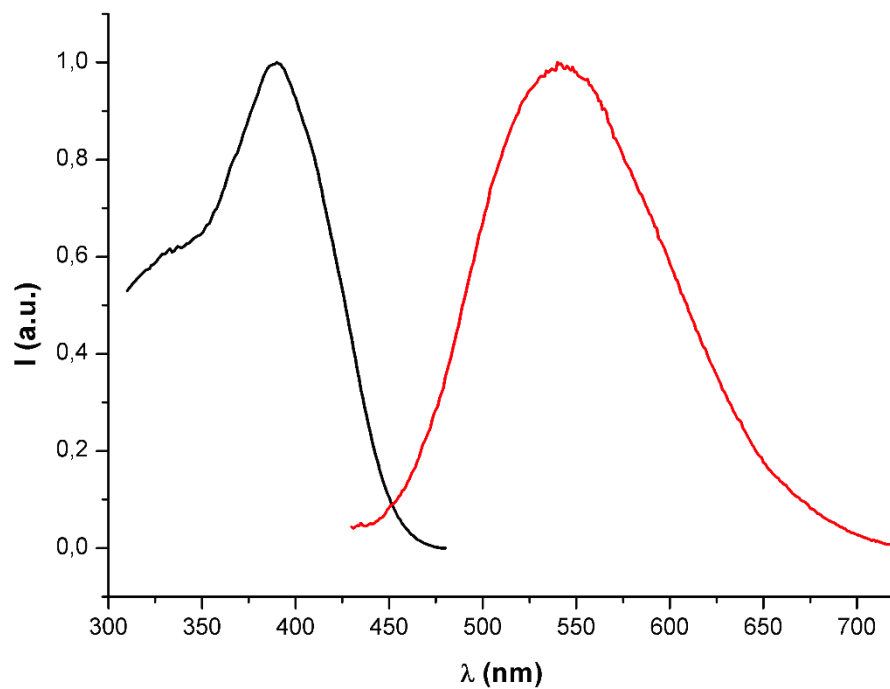

**Figure S18.**Excitation and emission spectra for complex **3** in solid state at room temperature.

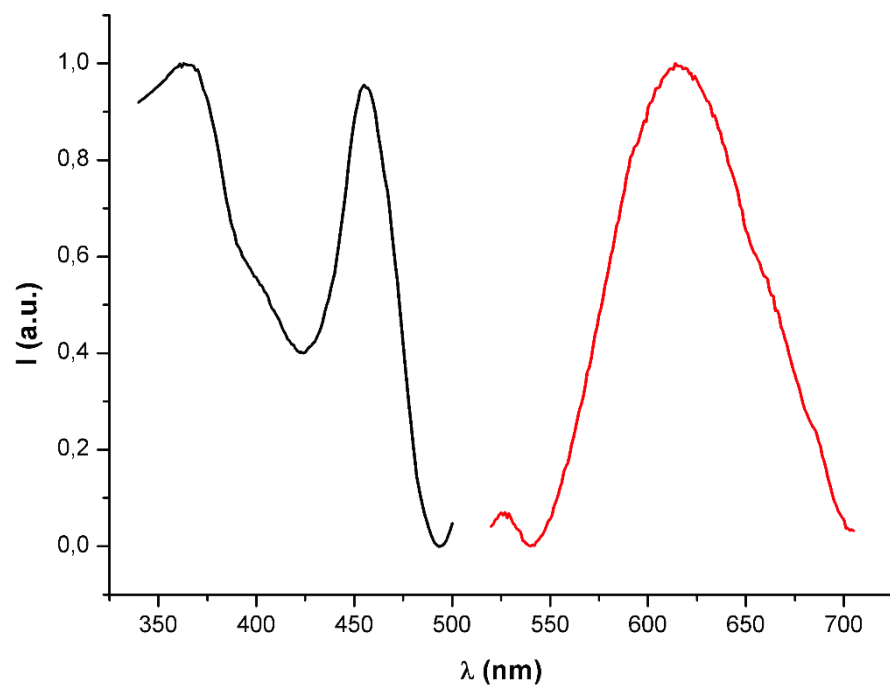

**Figure S19.**Excitation and emission spectra for complex **4** in solid state at room temperature.



## GEOMETRIES IN XYZ FORMAT FOR FULLY OPTIMIZED THEORETICAL MODELS

### Model 3a S<sub>0</sub>.

|    |             |             |             |
|----|-------------|-------------|-------------|
| Au | 0.17187900  | 1.72758000  | -0.36512100 |
| Au | -0.16145100 | -1.72238200 | -0.32614600 |
| Cu | -0.03419900 | 0.03779600  | 1.90417200  |
| P  | 2.21470700  | 1.88800900  | 0.75706700  |
| N  | 1.83562900  | -0.41347500 | 2.13858800  |
| C  | 3.62903100  | 2.50478200  | -0.22952500 |
| N  | -1.91454800 | 0.48075900  | 2.06801700  |
| C  | 1.17875600  | 4.10165700  | 2.08545000  |
| H  | 0.60254400  | 4.24541800  | 1.16660300  |
| C  | 1.04691100  | 5.00359200  | 3.13656400  |
| H  | 0.37424200  | 5.85860400  | 3.03275600  |
| C  | -2.84822300 | -0.28657100 | 1.47247000  |
| C  | 2.79970200  | 0.30697900  | 1.53276400  |
| C  | 2.04630800  | 3.00988200  | 2.20635400  |
| C  | 4.66478500  | 3.24654800  | 0.34794800  |
| H  | 4.63935700  | 3.50286600  | 1.41010300  |
| C  | 5.75042200  | 3.37922300  | -1.80294500 |
| H  | 6.58221300  | 3.72632600  | -2.42097600 |
| C  | 2.62413900  | 3.72542300  | 4.43998900  |
| H  | 3.18950900  | 3.57550100  | 5.36313200  |
| C  | 2.76790500  | 2.82357600  | 3.38944400  |
| H  | 3.44504800  | 1.97285100  | 3.50093000  |
| C  | 4.12175900  | -0.11197900 | 1.50884300  |
| H  | 4.87187600  | 0.48802800  | 0.99035100  |
| C  | 2.17031200  | -1.54880900 | 2.76385000  |
| H  | 1.35527200  | -2.10343700 | 3.23301600  |
| C  | 1.76728200  | 4.81561100  | 4.31365500  |
| H  | 1.66014100  | 5.52371300  | 5.13917500  |
| C  | -4.17527300 | 0.10737200  | 1.38641700  |
| H  | -4.90024000 | -0.53232000 | 0.87958800  |
| C  | -2.28486300 | 1.64203800  | 2.62085500  |
| H  | -1.49344200 | 2.23373300  | 3.08499700  |
| C  | 3.47371900  | -2.02597300 | 2.79444200  |
| H  | 3.69179700  | -2.96808300 | 3.29927500  |
| C  | 4.46356200  | -1.30428800 | 2.14435100  |
| H  | 5.49548000  | -1.66320800 | 2.12639200  |
| C  | 5.72400800  | 3.67942200  | -0.44271400 |
| H  | 6.53086200  | 4.26384600  | 0.00629100  |
| C  | 4.71435000  | 2.65019400  | -2.37969500 |
| H  | 4.72694600  | 2.42115900  | -3.44749000 |
| C  | -3.59539400 | 2.09925100  | 2.58450700  |
| H  | -3.84300600 | 3.06416100  | 3.02910500  |
| C  | -4.55372300 | 1.32682400  | 1.94531600  |
| H  | -5.58979100 | 1.66740600  | 1.87732200  |
| C  | 3.64877300  | 2.21562400  | -1.59772100 |
| H  | 2.82607200  | 1.66071700  | -2.05802900 |
| P  | -2.20642400 | -1.88780800 | 0.79072300  |
| F  | -2.12837200 | 3.71338900  | 0.26232900  |
| C  | -3.58710900 | -2.60134100 | -0.17738300 |
| C  | -1.68240300 | 1.94852400  | -1.21822500 |
| C  | 1.68622400  | -1.95119700 | -1.18852800 |
| C  | -2.53037000 | 2.94590400  | -0.75523500 |
| C  | -2.01391400 | -2.92671500 | 2.29761400  |
| Cl | -4.81148400 | 4.43993800  | -0.63076100 |
| F  | -1.43734700 | 0.20547200  | -2.76572400 |
| F  | 2.20538600  | -3.61598400 | 0.38176800  |
| C  | 2.56424000  | -2.90530200 | -0.69216400 |
| C  | -4.60999000 | -3.33885600 | 0.42762700  |
| H  | -4.59451700 | -3.53127800 | 1.50331000  |

|    |             |             |             |
|----|-------------|-------------|-------------|
| C  | -1.08836600 | -3.97566100 | 2.24763400  |
| H  | -0.48517500 | -4.13187900 | 1.34820600  |
| C  | -2.17619300 | 1.19552800  | -2.27501900 |
| C  | -3.79584400 | 3.19830200  | -1.27610100 |
| Cl | 4.87242200  | -4.35576400 | -0.55204600 |
| F  | 1.36539900  | -0.30620000 | -2.82513600 |
| C  | -3.59267800 | -2.39122900 | -1.55992400 |
| H  | -2.78014000 | -1.83629700 | -2.03789700 |
| C  | 2.13504200  | -1.25530400 | -2.30257200 |
| C  | -4.63210900 | -2.90260600 | -2.33063900 |
| H  | -4.63495400 | -2.73501100 | -3.40989800 |
| C  | -2.60142600 | -3.56236200 | 4.55278100  |
| H  | -3.19322900 | -3.39788000 | 5.45666500  |
| C  | 3.81712100  | -3.16974900 | -1.23703200 |
| C  | -0.93248100 | -4.81755000 | 3.34442400  |
| H  | -0.21510300 | -5.64059400 | 3.29555000  |
| C  | -2.76943600 | -2.72137700 | 3.45629600  |
| H  | -3.49175300 | -1.90282300 | 3.51268300  |
| Cl | 3.85549700  | -0.60790100 | -4.31832500 |
| Cl | -3.97178100 | 0.45727200  | -4.19280500 |
| F  | 5.38145200  | -2.67520500 | -2.90448800 |
| F  | -5.42138100 | 2.62749000  | -2.85825800 |
| C  | 4.20627100  | -2.44800600 | -2.36119200 |
| C  | 3.36766800  | -1.48374300 | -2.91121800 |
| C  | -3.42477800 | 1.40695700  | -2.85715100 |
| C  | -1.68685600 | -4.61084700 | 4.49685800  |
| H  | -1.56149000 | -5.27158000 | 5.35831400  |
| C  | -5.64244800 | -3.84922500 | -0.35190800 |
| H  | -6.43918600 | -4.43088200 | 0.11824000  |
| C  | -4.23173600 | 2.41575600  | -2.34057600 |
| C  | -5.65482000 | -3.62926100 | -1.72774800 |
| H  | -6.46568000 | -4.03683700 | -2.33662200 |

### Model 3a T<sub>1</sub>.

|    |             |             |             |
|----|-------------|-------------|-------------|
| Au | -0.52190100 | -1.90567900 | -0.28901300 |
| Au | 0.52877900  | 1.88073600  | -0.29220300 |
| Cu | -0.03417400 | 0.00400700  | 1.47165800  |
| P  | -2.57583400 | -1.72864800 | 0.82782400  |
| N  | -1.79907600 | 0.66613800  | 1.77673000  |
| C  | -4.04611400 | -2.30840100 | -0.09256600 |
| N  | 1.73736500  | -0.67563000 | 1.83648100  |
| C  | -1.79007600 | -3.92023000 | 2.36785800  |
| H  | -1.29579800 | -4.25978900 | 1.45249600  |
| C  | -1.73120900 | -4.69941200 | 3.51883600  |
| H  | -1.19568700 | -5.65191900 | 3.50069100  |
| C  | 2.85817000  | -0.02813700 | 1.41437200  |
| C  | -2.90590200 | -0.00409800 | 1.31964200  |
| C  | -2.48636100 | -2.70527400 | 2.38289800  |
| C  | -5.03437600 | -3.08429000 | 0.51909700  |
| H  | -4.94090600 | -3.37599400 | 1.56801000  |
| C  | -6.25853700 | -3.13254000 | -1.56022300 |
| H  | -7.12717600 | -3.45947300 | -2.13718100 |
| C  | -3.03859800 | -3.05406200 | 4.70662900  |
| H  | -3.52650700 | -2.71357400 | 5.62330300  |
| C  | -3.10988800 | -2.27254300 | 3.55640800  |
| H  | -3.65160700 | -1.32300900 | 3.57468400  |
| C  | -4.15244300 | 0.60044900  | 1.25677100  |
| H  | -5.00080400 | 0.02904100  | 0.87352000  |
| C  | -1.96025100 | 1.94994000  | 2.19789200  |
| H  | -1.05996800 | 2.45664200  | 2.55354200  |
| C  | -2.35347700 | -4.26608000 | 4.68775700  |

|    |             |             |             |
|----|-------------|-------------|-------------|
| H  | -2.30380900 | -4.87847100 | 5.59156300  |
| C  | 4.10399300  | -0.63770200 | 1.43805500  |
| H  | 4.97525200  | -0.08733300 | 1.07663500  |
| C  | 1.85946000  | -1.93670000 | 2.30900400  |
| H  | 0.93588300  | -2.42604100 | 2.62768100  |
| C  | -3.17426400 | 2.59285600  | 2.17139200  |
| H  | -3.23749200 | 3.62340500  | 2.52489500  |
| C  | -4.30460900 | 1.91936600  | 1.67571300  |
| H  | -5.27441800 | 2.41648100  | 1.61675200  |
| C  | -6.14003600 | -3.49292900 | -0.22031700 |
| H  | -6.91363600 | -4.10057500 | 0.25543800  |
| C  | -5.26956800 | -2.36411700 | -2.16958000 |
| H  | -5.35733600 | -2.08475600 | -3.22207000 |
| C  | 3.07139600  | -2.59165400 | 2.37011800  |
| H  | 3.10827200  | -3.61192600 | 2.75472300  |
| C  | 4.22208400  | -1.94105700 | 1.91377200  |
| H  | 5.19116700  | -2.44407700 | 1.92384000  |
| C  | -4.15771100 | -1.95532400 | -1.44171700 |
| H  | -3.37751300 | -1.36302800 | -1.92787600 |
| P  | 2.57234900  | 1.69134000  | 0.83554500  |
| F  | 1.44924600  | -4.28836800 | 0.10351800  |
| C  | 4.08131900  | 2.17195700  | -0.07999500 |
| C  | 1.25404300  | -2.36027700 | -1.21606500 |
| C  | -1.24614700 | 2.39097700  | -1.18418500 |
| C  | 1.94719500  | -3.51074400 | -0.86057300 |
| C  | 2.50301300  | 2.71166700  | 2.36174900  |
| Cl | 3.96861200  | -5.34048800 | -0.94402600 |
| F  | 1.25817900  | -0.45727300 | -2.58292400 |
| F  | -1.23283100 | 4.39205300  | 0.03656400  |
| C  | -1.83836000 | 3.60431600  | -0.85458100 |
| C  | 5.09370300  | 2.92928300  | 0.51534600  |
| H  | 4.99798400  | 3.26907000  | 1.54950600  |
| C  | 1.79502800  | 3.91936400  | 2.32017200  |
| H  | 1.28103600  | 4.22707400  | 1.40439000  |
| C  | 1.84168400  | -1.59299100 | -2.21345900 |
| C  | 3.14638200  | -3.90622700 | -1.44325300 |
| Cl | -3.73178500 | 5.56498200  | -0.92737000 |
| F  | -1.46210900 | 0.42028600  | -2.43580800 |
| C  | 4.19580500  | 1.76169400  | -1.41272100 |
| H  | 3.39400100  | 1.19120000  | -1.88993500 |
| C  | -1.94234400 | 1.61460200  | -2.10131300 |
| C  | 5.33463300  | 2.09098900  | -2.13893800 |
| H  | 5.42328200  | 1.76625600  | -3.17817100 |
| C  | 3.08830300  | 3.13830300  | 4.66500100  |
| H  | 3.59327800  | 2.83073100  | 5.58402600  |
| C  | -3.03902400 | 4.05342200  | -1.39162600 |
| C  | 1.74536900  | 4.73225800  | 3.44813900  |
| H  | 1.19742500  | 5.67692900  | 3.40916500  |
| C  | 3.14953500  | 2.32245200  | 3.53881000  |
| H  | 3.70147100  | 1.37983700  | 3.58247700  |
| Cl | -3.94424900 | 1.02713700  | -3.86084700 |
| Cl | 3.69547800  | -0.96491600 | -4.11396200 |
| F  | -4.81668200 | 3.63261500  | -2.85138600 |
| F  | 4.80688400  | -3.44932100 | -3.02557500 |
| C  | -3.68117000 | 3.23976700  | -2.32133300 |
| C  | -3.13870200 | 2.01258900  | -2.69173000 |
| C  | 3.02986000  | -1.93968300 | -2.85136000 |
| C  | 2.38939100  | 4.34178600  | 4.61980500  |
| H  | 2.34570100  | 4.98038200  | 5.50556100  |
| C  | 6.22598900  | 3.26007200  | -0.22292700 |
| H  | 7.01756500  | 3.85477500  | 0.23944100  |
| C  | 3.67707600  | -3.10511200 | -2.45112200 |
| C  | 6.34793900  | 2.83965600  | -1.54488100 |

|   |            |            |             |
|---|------------|------------|-------------|
| H | 7.23787600 | 3.10531800 | -2.12080700 |
|---|------------|------------|-------------|

### Model 4a S<sub>0</sub>

|    |             |             |             |
|----|-------------|-------------|-------------|
| Au | 2.55094800  | 1.22043300  | -0.12387800 |
| Au | -2.10089300 | -1.89780300 | 0.09424200  |
| Cu | -1.32272100 | 1.36037300  | 0.04692500  |
| P  | -4.01305100 | -0.60920000 | 0.36990800  |
| P  | 1.67702900  | 3.37390900  | -0.12216100 |
| Cl | 0.98318200  | -5.49851200 | -3.09467000 |
| Cl | 2.44999400  | -4.74236700 | 2.05888900  |
| F  | -1.07400000 | -3.53614300 | -2.41331700 |
| C  | -5.10097700 | 1.67942100  | -2.89776500 |
| F  | 0.21484900  | -2.85491400 | 2.03649300  |
| F  | 2.57517000  | -5.85386300 | -0.65179500 |
| N  | -0.73962000 | 2.92551100  | -1.32271100 |
| C  | -0.27011100 | -3.78809500 | -1.38313100 |
| C  | -4.15815800 | 0.36216400  | 1.92009000  |
| C  | 0.16894600  | 0.26850700  | 2.44555500  |
| N  | -2.98096900 | 1.40851400  | -1.11522200 |
| C  | -1.70808700 | 3.09215500  | -2.24592800 |
| C  | 1.41465300  | -4.36708400 | 0.72775000  |
| C  | 0.37265200  | -3.45456300 | 0.84772500  |
| N  | -0.43783600 | 0.70030500  | 1.56697100  |
| C  | 0.90978100  | 3.90985200  | 1.46089900  |
| C  | 0.75740800  | -4.70718000 | -1.57830400 |
| C  | -2.90638800 | 2.29758700  | -2.12574000 |
| C  | -0.26725200 | 4.65677900  | 1.53687300  |
| C  | 1.59736600  | -4.98924300 | -0.50433100 |
| C  | -4.07813000 | 0.66899000  | -0.97935500 |
| C  | -5.17012600 | 0.78430500  | -1.85347100 |
| C  | 4.08637700  | 4.26207000  | -1.20292000 |
| C  | 2.95000200  | 4.64751100  | -0.48482400 |
| C  | -0.50137800 | -3.13710000 | -0.17873700 |
| C  | -0.75781800 | 5.05494700  | 2.77851500  |
| C  | -0.07293100 | 4.72007500  | 3.94236900  |
| C  | 0.35943300  | 3.66684800  | -1.40671200 |
| C  | -3.94814700 | 2.46558900  | -3.06660500 |
| C  | -4.75292400 | 1.62602200  | 1.96786700  |
| C  | 2.80662200  | 5.97286700  | -0.06084800 |
| C  | 3.79177500  | 6.90568700  | -0.36567900 |
| C  | -1.59994500 | 4.00808600  | -3.31730400 |
| C  | -4.87413900 | 2.28956500  | 3.18555900  |
| C  | 4.91883900  | 6.52194700  | -1.09004800 |
| C  | -3.82027400 | 0.43260400  | 4.30950400  |
| C  | -4.41179500 | 1.69277300  | 4.35535800  |
| C  | -0.41665000 | 4.76178500  | -3.39719300 |
| C  | 5.06606600  | 5.20258700  | -1.50799300 |
| C  | 0.55986200  | 4.59744200  | -2.44198200 |
| C  | -3.68562700 | -0.23082800 | 3.09473700  |
| C  | -2.66727000 | 4.14105800  | -4.25979600 |
| C  | 1.10621500  | 3.98136900  | 3.86793500  |
| C  | 1.59411300  | 3.56947500  | 2.63271800  |
| C  | 0.94792700  | -0.26201700 | 3.53634400  |
| Cl | 4.46948400  | -3.56657700 | -2.60525000 |
| Cl | 5.65328900  | -2.71838900 | 2.60498100  |
| F  | 3.01824500  | -1.04446300 | -2.30800100 |
| F  | 4.02743000  | -0.32045600 | 2.20834500  |
| F  | 5.64831400  | -4.11473100 | 0.02352800  |
| C  | -5.58218200 | -1.54421000 | 0.19517200  |
| C  | -5.56404400 | -2.69673800 | -0.59814000 |
| C  | 4.12502000  | -1.04758700 | 1.08514500  |

|   |             |             |             |
|---|-------------|-------------|-------------|
| C | 4.33545300  | -2.60031000 | -1.18182900 |
| C | -3.79949600 | 3.40209700  | -4.13693600 |
| C | 4.86785100  | -2.22101900 | 1.14998800  |
| C | -7.92751100 | -1.88843900 | 0.64118200  |
| C | -7.91097700 | -3.02875500 | -0.15892600 |
| C | 4.96233000  | -2.99539300 | -0.00286300 |
| C | 3.61159500  | -1.41059900 | -1.17524400 |
| C | -6.76641300 | -1.14320900 | 0.82098800  |
| C | -6.73101100 | -3.43240500 | -0.77799800 |
| C | 3.48506200  | -0.59542000 | -0.05856800 |
| H | 2.51733300  | 2.98413200  | 2.57512000  |
| H | 1.65348000  | 3.72613800  | 4.77915900  |
| H | -0.45613100 | 5.04180300  | 4.91397500  |
| H | -1.67932500 | 5.63995100  | 2.83319500  |
| H | -0.81099400 | 4.93433700  | 0.63098200  |
| H | 1.93201400  | 6.27541300  | 0.52094600  |
| H | 3.68291300  | 7.93920500  | -0.02757600 |
| H | 5.69390500  | 7.25695700  | -1.32132000 |
| H | 5.95515600  | 4.89695400  | -2.06470900 |
| H | 4.20990300  | 3.21936300  | -1.51110700 |
| H | -2.55234700 | 4.85404500  | -5.07976700 |
| H | -4.61605600 | 3.50743000  | -4.85523500 |
| H | -3.21213800 | -1.21628800 | 3.05489000  |
| H | -3.46079200 | -0.03898500 | 5.22754100  |
| H | -4.51597200 | 2.21264600  | 5.31104000  |
| H | -5.34122600 | 3.27705300  | 3.22045100  |
| H | -5.12671500 | 2.09971000  | 1.05619500  |
| H | -6.78151700 | -0.25890800 | 1.46311600  |
| H | -8.85104800 | -1.58004100 | 1.13741300  |
| H | -8.82428300 | -3.61414300 | -0.29169500 |
| H | -6.71278300 | -4.33420300 | -1.39465300 |
| H | -4.63023200 | -3.02542600 | -1.06510300 |
| H | -0.28295600 | 5.47735900  | -4.21293100 |
| H | 1.48224300  | 5.17874900  | -2.47827300 |
| H | -6.05077700 | 0.15744200  | -1.70406000 |
| H | -5.93283300 | 1.78115600  | -3.59995200 |
| H | 0.88515400  | 0.41841800  | 4.39615700  |
| H | 0.56921300  | -1.25559900 | 3.80940000  |
| H | 1.99596000  | -0.35548500 | 3.21472700  |

#### Model 4a T<sub>1</sub>

|    |             |             |             |
|----|-------------|-------------|-------------|
| Au | 2.61466100  | 1.01536200  | 0.08470100  |
| Au | -2.24487900 | -1.76049800 | 0.02074200  |
| Cu | -1.67404900 | 0.86026900  | -0.15969200 |
| P  | -4.41981000 | -0.91175200 | 0.16603800  |
| P  | 1.40642500  | 3.01134100  | 0.17794600  |
| Cl | 2.20821800  | -3.33342300 | -3.22153300 |
| Cl | 2.38465600  | -4.35169100 | 2.08817700  |
| F  | -0.36736600 | -2.11501600 | -2.52904000 |
| C  | -5.32544600 | 1.54448100  | -3.02879500 |
| F  | -0.20946200 | -2.98986800 | 2.06382200  |
| F  | 3.30592800  | -4.33528200 | -0.69625100 |
| N  | -1.00653700 | 2.50723200  | -1.16937900 |
| C  | 0.24518400  | -2.63103900 | -1.46903900 |
| C  | -4.84304900 | -0.08568400 | 1.74755500  |
| C  | 0.07861600  | 0.12664700  | 2.26112600  |
| N  | -3.25715200 | 1.07982600  | -1.18722000 |
| C  | -1.93806200 | 2.78800200  | -2.15213400 |
| C  | 1.56387300  | -3.69637500 | 0.72020000  |
| C  | 0.32631600  | -3.07790100 | 0.83909100  |
| N  | -0.52048800 | 0.48895400  | 1.34807100  |

|    |             |             |             |
|----|-------------|-------------|-------------|
| C  | 0.57502500  | 3.43752900  | 1.76586600  |
| C  | 1.48329400  | -3.23674100 | -1.66250600 |
| C  | -3.12646100 | 2.04849300  | -2.15205300 |
| C  | -0.70445000 | 3.99020000  | 1.83744700  |
| C  | 2.13254900  | -3.76661900 | -0.54980800 |
| C  | -4.42497400 | 0.37276700  | -1.12832300 |
| C  | -5.45939000 | 0.58425100  | -2.01272100 |
| C  | 3.77357000  | 4.16725900  | -0.75430300 |
| C  | 2.58127600  | 4.40807300  | -0.06388300 |
| C  | -0.37396800 | -2.53808700 | -0.22892600 |
| C  | -1.24844500 | 4.32391900  | 3.07676800  |
| C  | -0.51592400 | 4.12071300  | 4.24192600  |
| C  | 0.10956400  | 3.26665100  | -1.13706200 |
| C  | -4.14540000 | 2.29054500  | -3.10791000 |
| C  | -5.57581800 | 1.10356100  | 1.77699400  |
| C  | 2.31151100  | 5.68611100  | 0.43698900  |
| C  | 3.22698700  | 6.71367200  | 0.23940700  |
| C  | -1.73306700 | 3.78441800  | -3.14854600 |
| C  | -5.90129700 | 1.68322300  | 3.00018200  |
| C  | 4.41066500  | 6.47321900  | -0.45550500 |
| C  | -4.77397500 | -0.10919000 | 4.16027600  |
| C  | -5.50456400 | 1.07674100  | 4.18913300  |
| C  | -0.54765400 | 4.50376500  | -3.10921300 |
| C  | 4.68300500  | 5.20212700  | -0.95229400 |
| C  | 0.36568400  | 4.24948700  | -2.08904200 |
| C  | -4.43603700 | -0.68904400 | 2.94213700  |
| C  | -2.75251500 | 4.00156300  | -4.12842800 |
| C  | 0.76782000  | 3.58187500  | 4.17115900  |
| C  | 1.31129600  | 3.23500900  | 2.93849400  |
| C  | 0.84446100  | -0.33614500 | 3.38699500  |
| Cl | 6.15477600  | -2.37727800 | -2.82281800 |
| Cl | 5.96976900  | -2.92405200 | 2.55225600  |
| F  | 4.08224500  | -0.36988300 | -2.32406400 |
| F  | 3.89857000  | -0.86877000 | 2.32979800  |
| F  | 6.85340900  | -3.45925800 | -0.19053100 |
| C  | -5.76767300 | -2.08351500 | -0.22520000 |
| C  | -5.52777700 | -3.06462700 | -1.19379200 |
| C  | 4.40174400  | -1.20085700 | 1.13103100  |
| C  | 5.47989900  | -1.92681000 | -1.30067200 |
| C  | -3.90988900 | 3.29110500  | -4.10573600 |
| C  | 5.39247700  | -2.17695300 | 1.10677900  |
| C  | -8.00955300 | -2.91596700 | 0.06947300  |
| C  | -7.77402700 | -3.88723800 | -0.89950100 |
| C  | 5.92340500  | -2.53385500 | -0.12928400 |
| C  | 4.48936800  | -0.95368700 | -1.20029000 |
| C  | -7.00849900 | -2.01148700 | 0.41213000  |
| C  | -6.53441900 | -3.96158300 | -1.53110600 |
| C  | 3.91786200  | -0.55739500 | 0.00289600  |
| H  | 2.32180900  | 2.81699400  | 2.88355600  |
| H  | 1.35458500  | 3.43851800  | 5.08249800  |
| H  | -0.94173600 | 4.39298900  | 5.21092800  |
| H  | -2.25080200 | 4.75657600  | 3.12750100  |
| H  | -1.28372400 | 4.16699900  | 0.92840700  |
| H  | 1.38908200  | 5.87986600  | 0.98997700  |
| H  | 3.01660000  | 7.70988900  | 0.63636300  |
| H  | 5.12984800  | 7.28270400  | -0.60374300 |
| H  | 5.61434200  | 5.00779800  | -1.48954500 |
| H  | 3.99542600  | 3.16418600  | -1.13107000 |
| H  | -2.57899700 | 4.76098000  | -4.89471700 |
| H  | -4.68715200 | 3.47054100  | -4.85255100 |
| H  | -3.85735500 | -1.61757000 | 2.91980900  |
| H  | -4.46501300 | -0.58711200 | 5.09325900  |
| H  | -5.76814800 | 1.53120500  | 5.14751000  |

|   |             |             |             |
|---|-------------|-------------|-------------|
| H | -6.47538800 | 2.61293100  | 3.02309700  |
| H | -5.89197900 | 1.57845000  | 0.84403100  |
| H | -7.19378700 | -1.25648100 | 1.18000900  |
| H | -8.98032200 | -2.86210000 | 0.56818100  |
| H | -8.56180700 | -4.59804000 | -1.16102500 |
| H | -6.34632500 | -4.72849600 | -2.28620000 |
| H | -4.55208500 | -3.12848100 | -1.68501100 |
| H | -0.34236200 | 5.27245700  | -3.85815700 |
| H | 1.28663900  | 4.82728100  | -2.02545700 |
| H | -6.36701100 | -0.01622900 | -1.92626100 |
| H | -6.12766100 | 1.70756400  | -3.75099300 |
| H | 0.80088500  | 0.41215400  | 4.18928600  |
| H | 0.43465100  | -1.29595100 | 3.73015500  |
| H | 1.88767200  | -0.48305200 | 3.06627800  |
